# Supplementary material
Source: PubMed Central journal article supplement (PMC3129415)

## Supplementary Heatmaps:

This supplementary document contains heatmaps for each of the 41 genes whose mutation status was correlated with the drastic over- and under-expression of other genes. Each page of this document contains: a single heatmap (plotted expressed genes  $\times$  samples) with a title indicating the hugo symbol for the mutated gene; the sample-dependent mutation status plotted along the top of the heatmap (black bar indicates that sample is mutated in said gene); the hugo symbol for each expressed gene; a color legend for the magnitude and direction of correlation. Note: some heatmaps contain many expressed genes and therefore the hugo symbols are illegible—for this reason the reader is encouraged to use the accompanying spreadsheet *Supplementary Mutation-correlated expression* available in the online supplement.

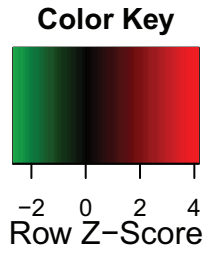

# AKR1C3 Mutations

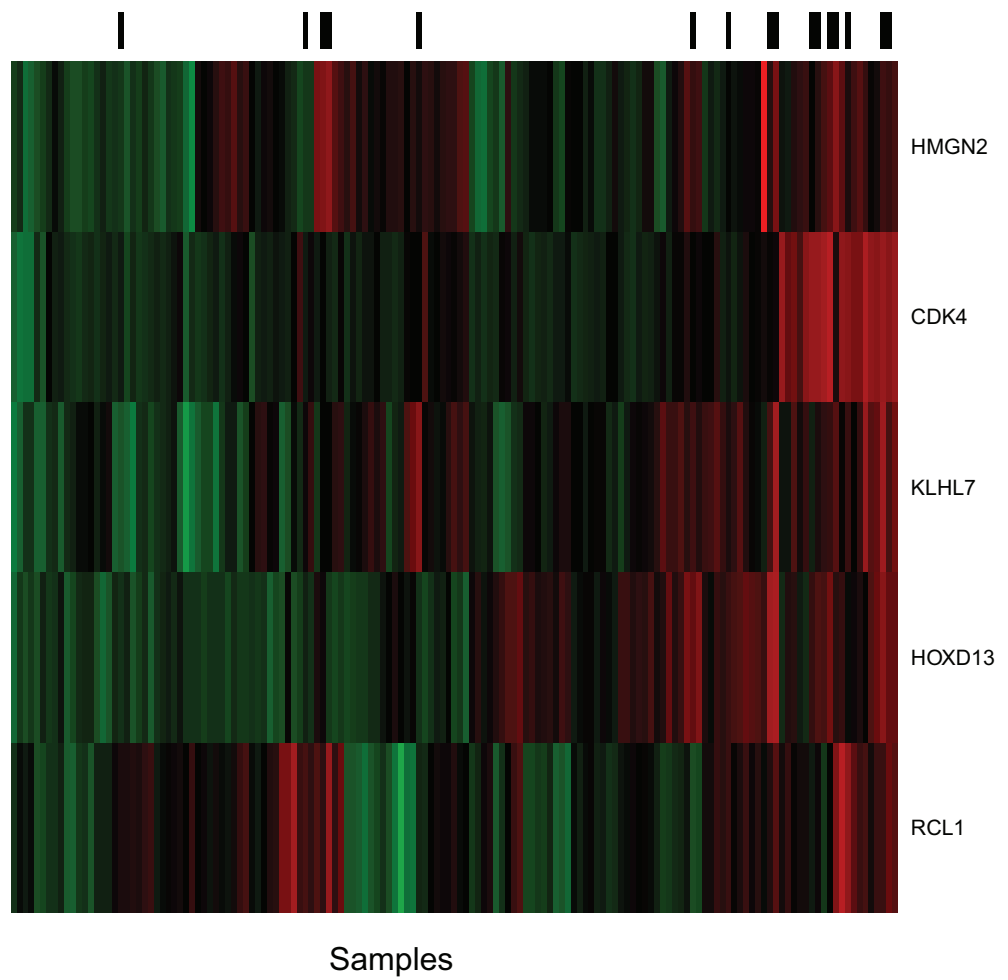

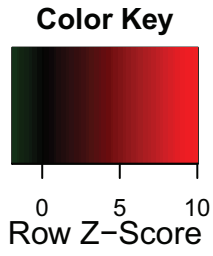

# ANK1 Mutations

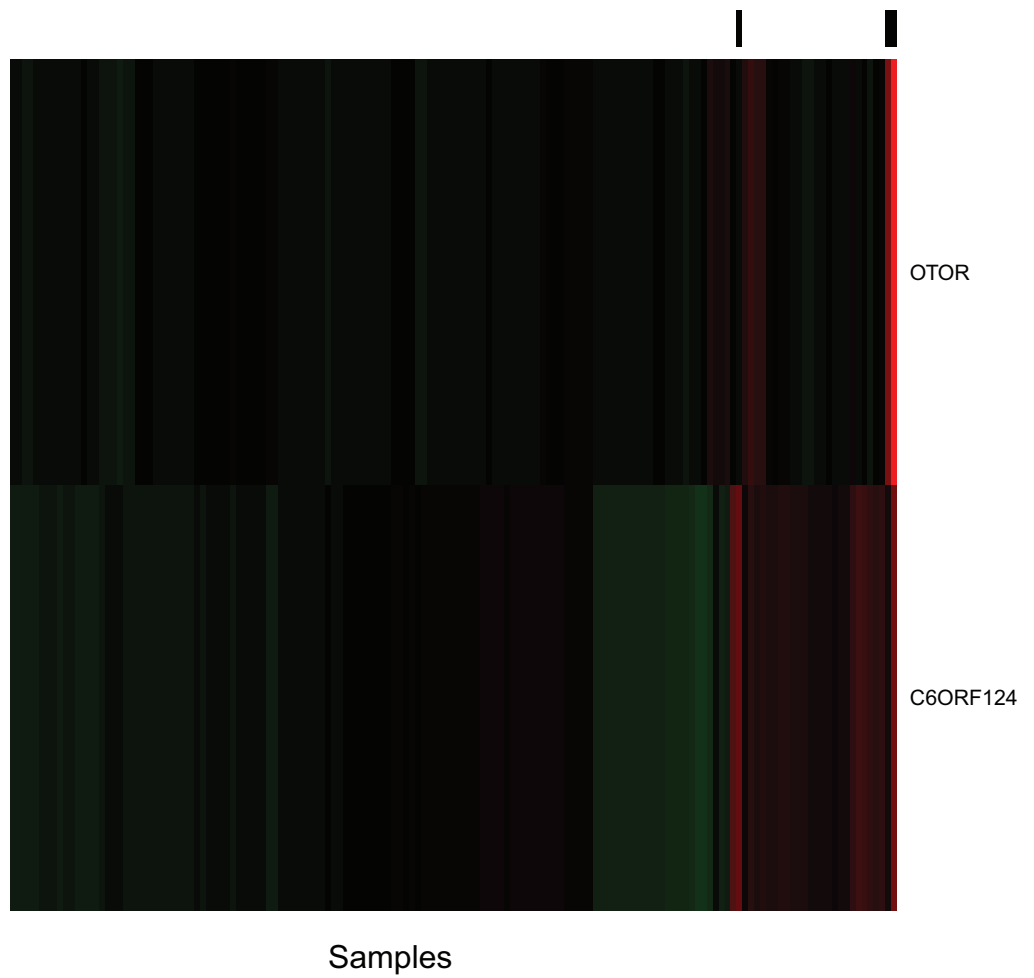

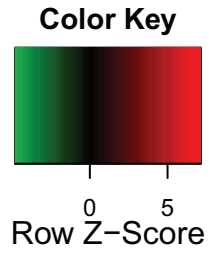

# ATM Mutations

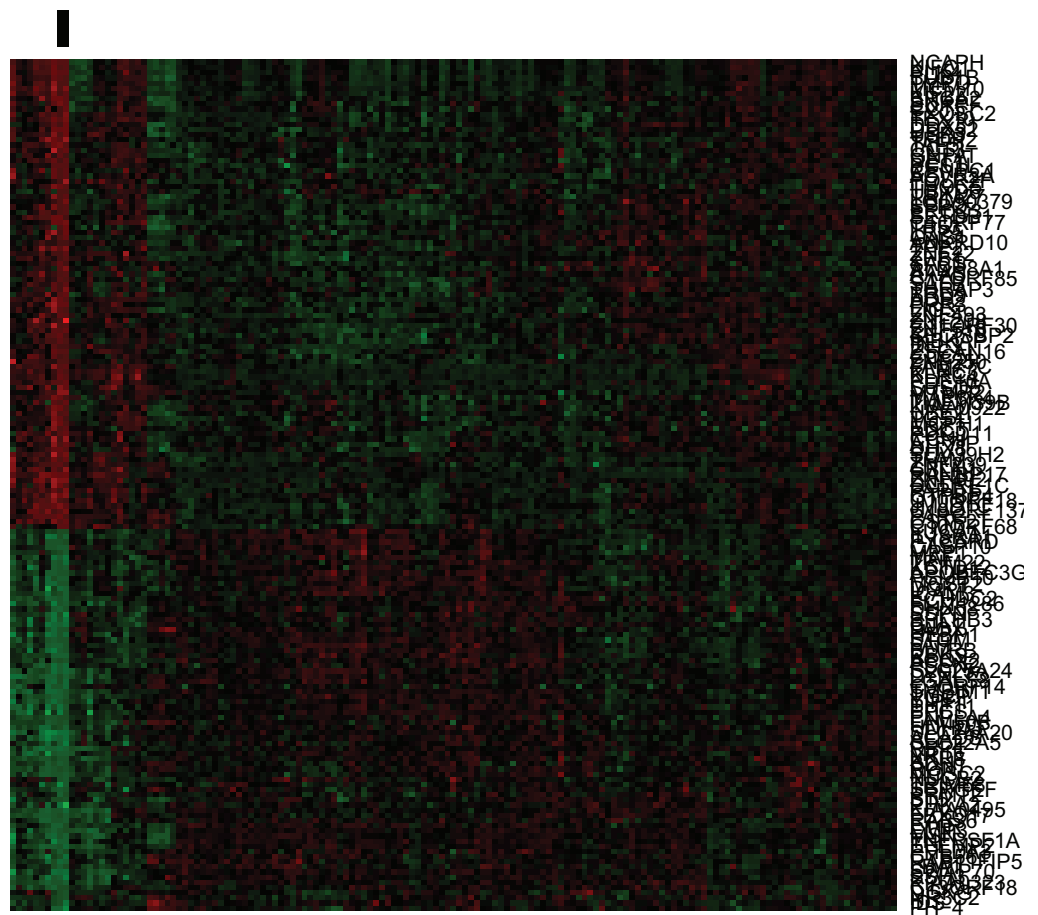

Samples

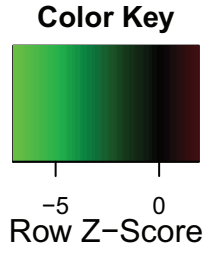

# CHL1 Mutations

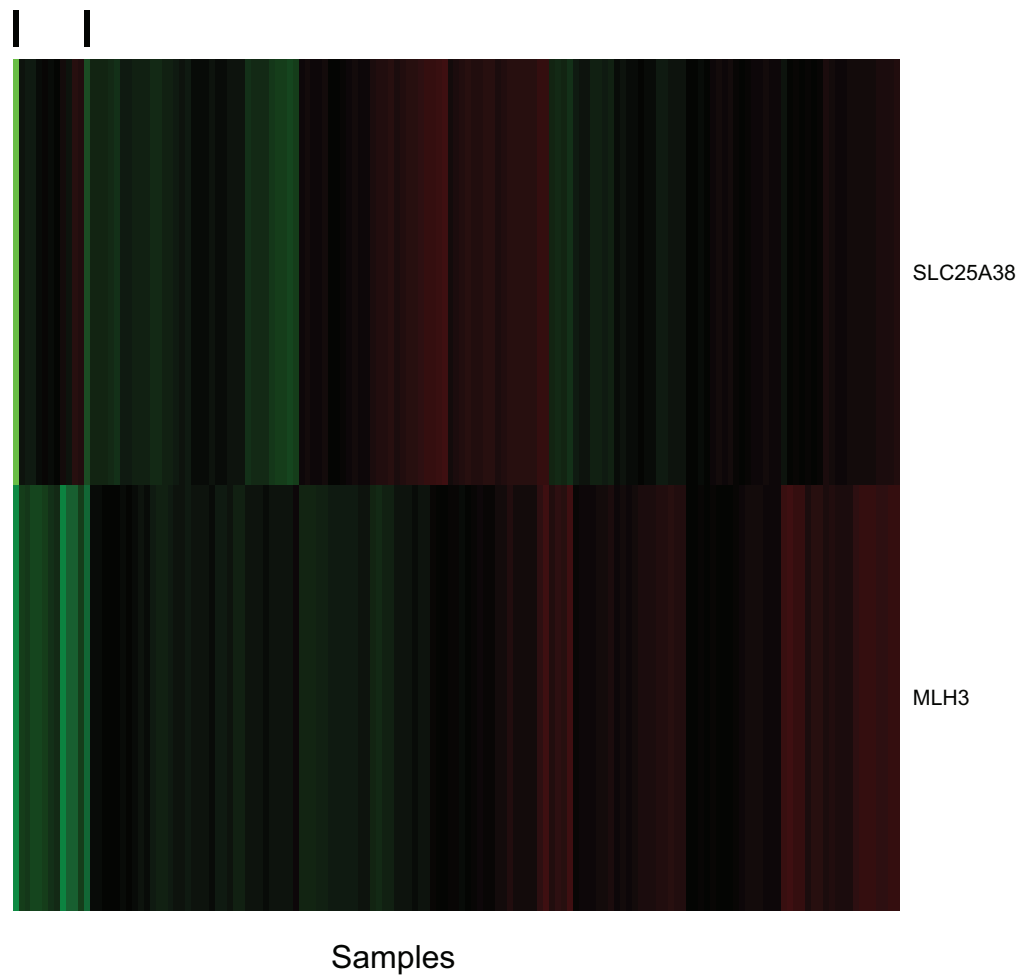

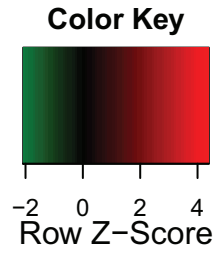

# ConsReg523 Mutations

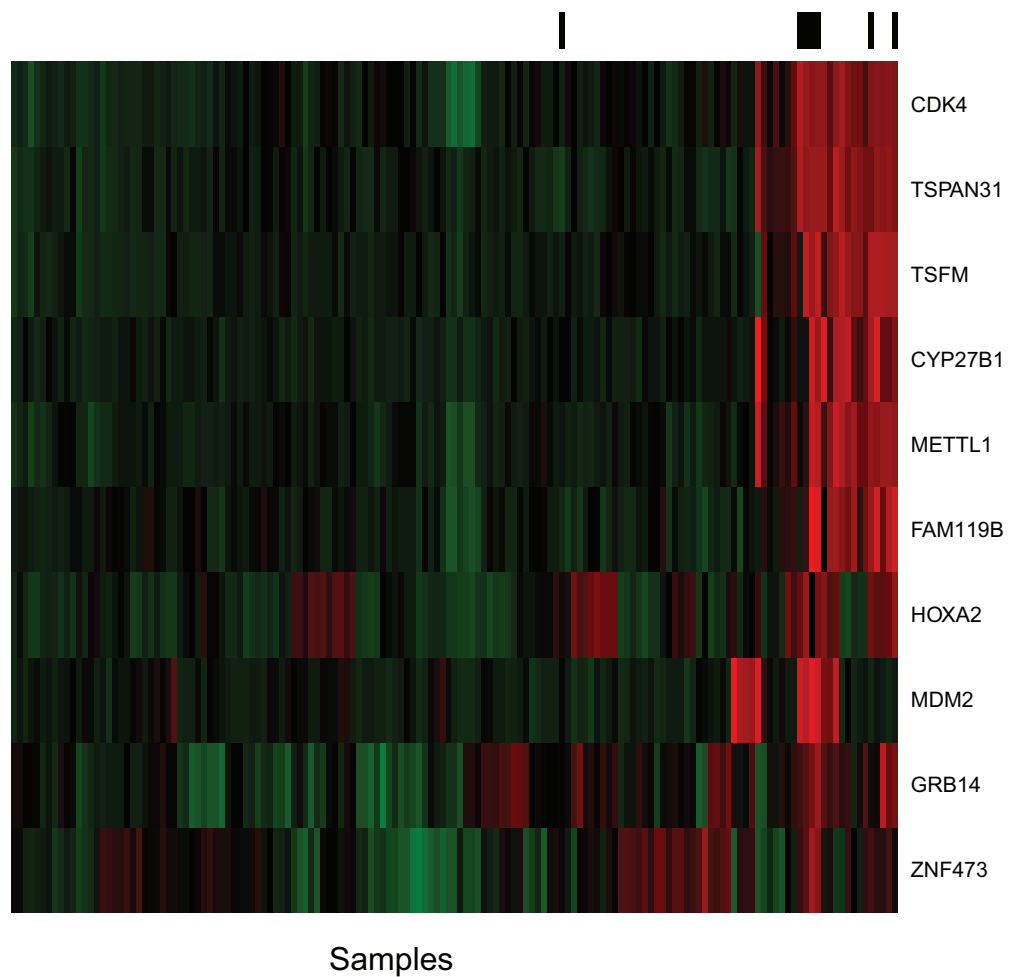

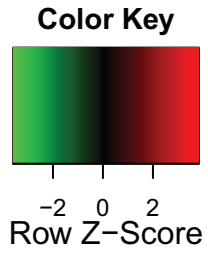

# DST Mutations

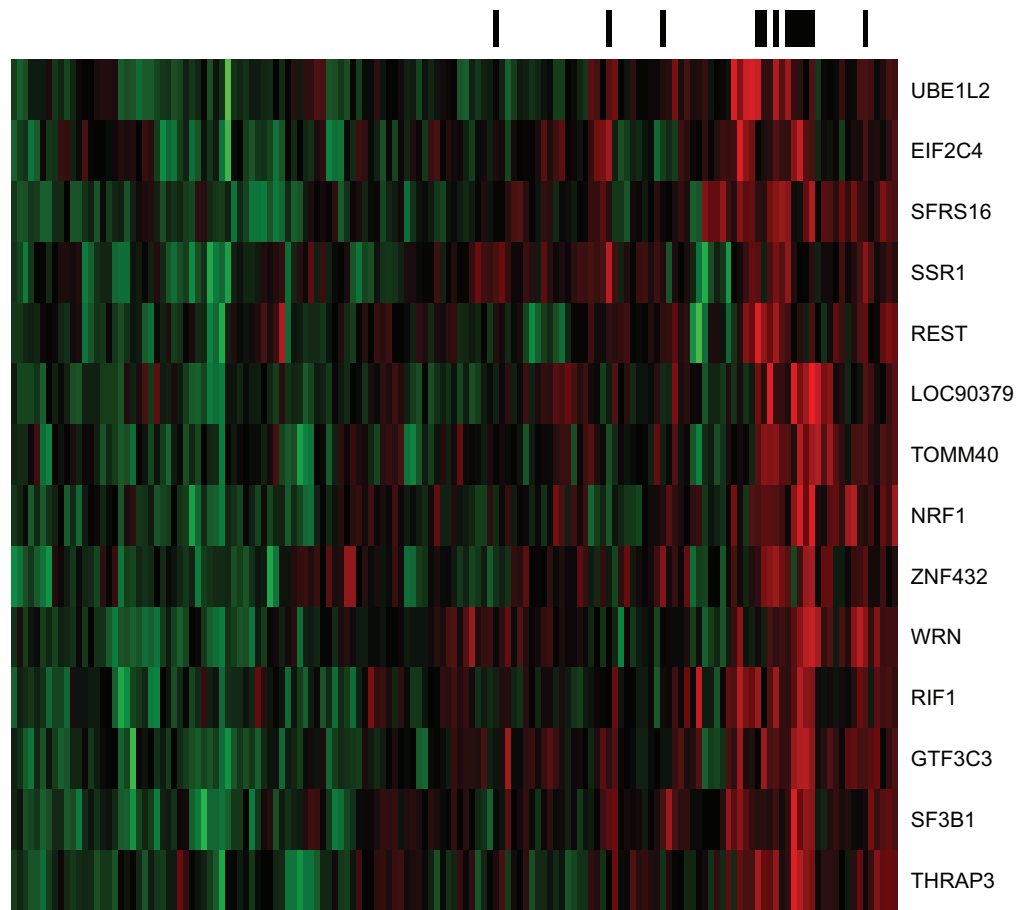

Samples

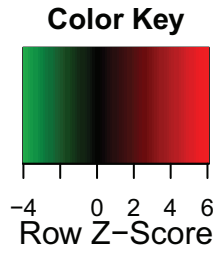

# EP300 Mutations

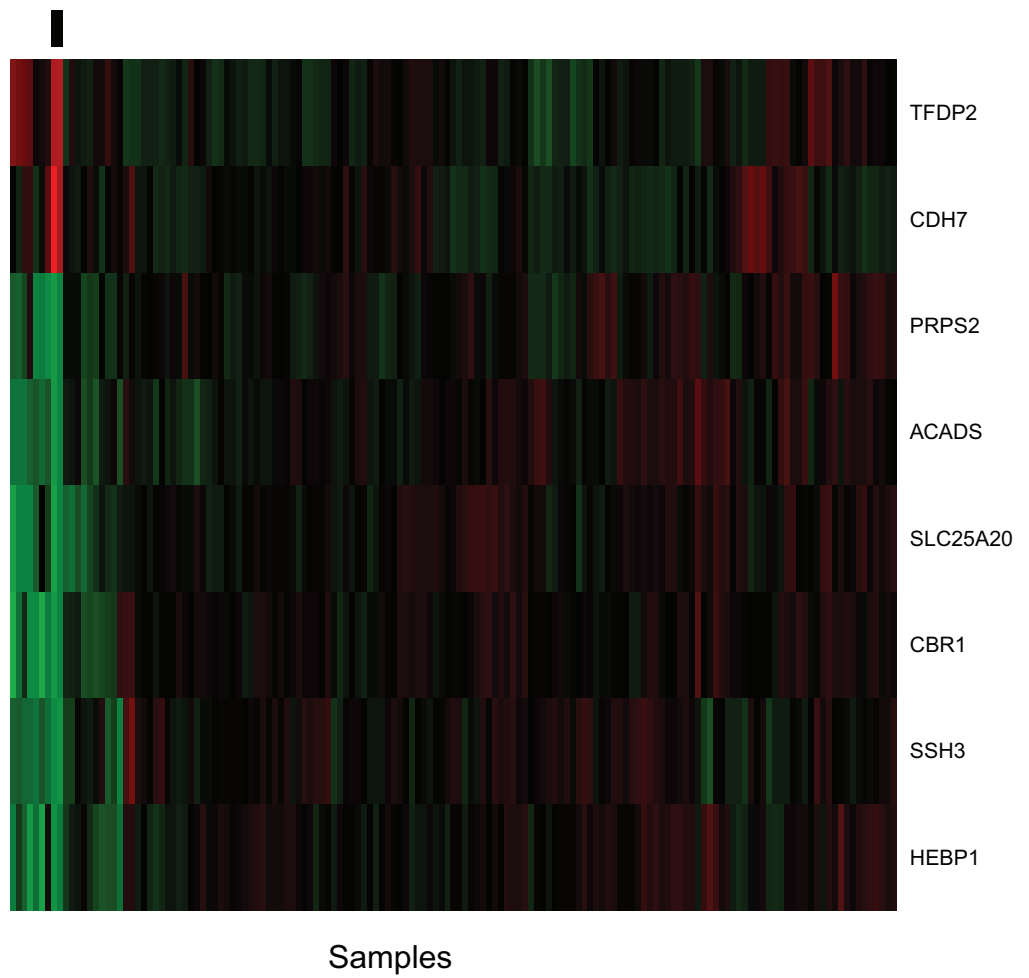



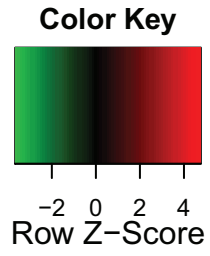

# EP400 Mutations

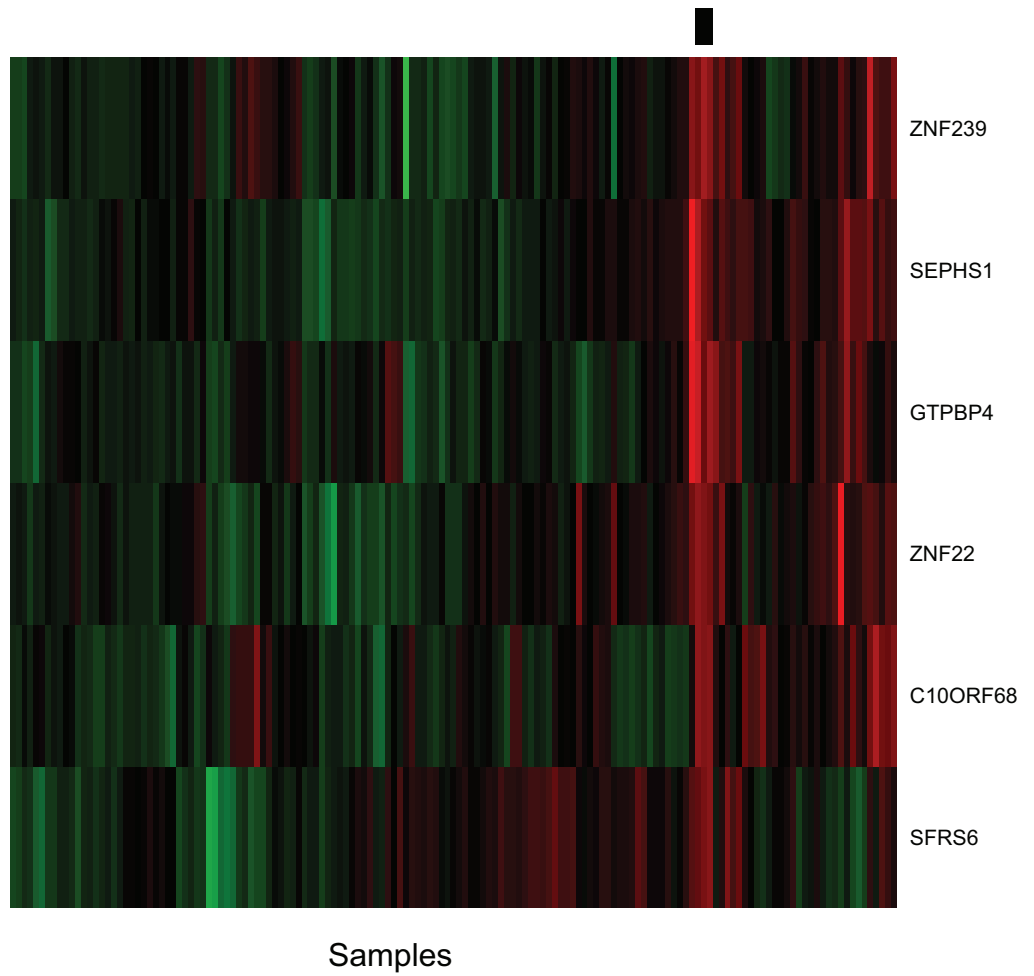

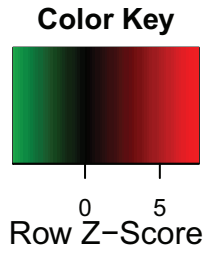

# EPHB4 Mutations

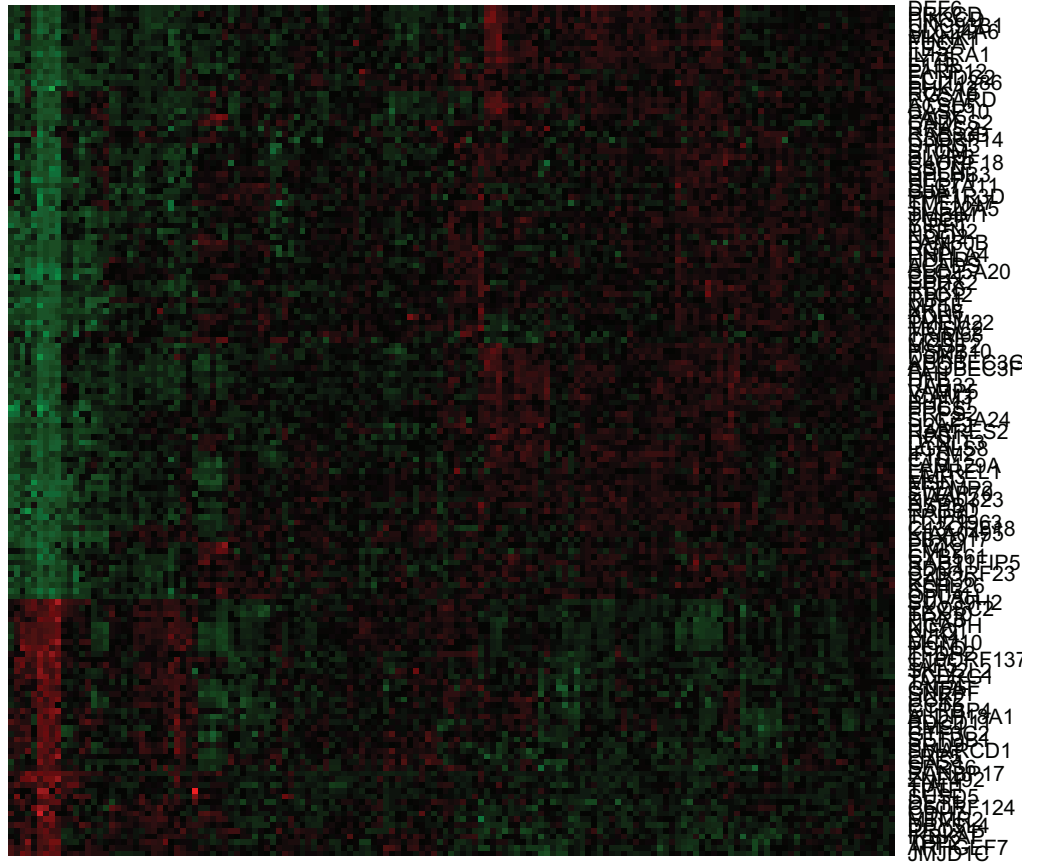

Samples



# FBXW7 Mutations

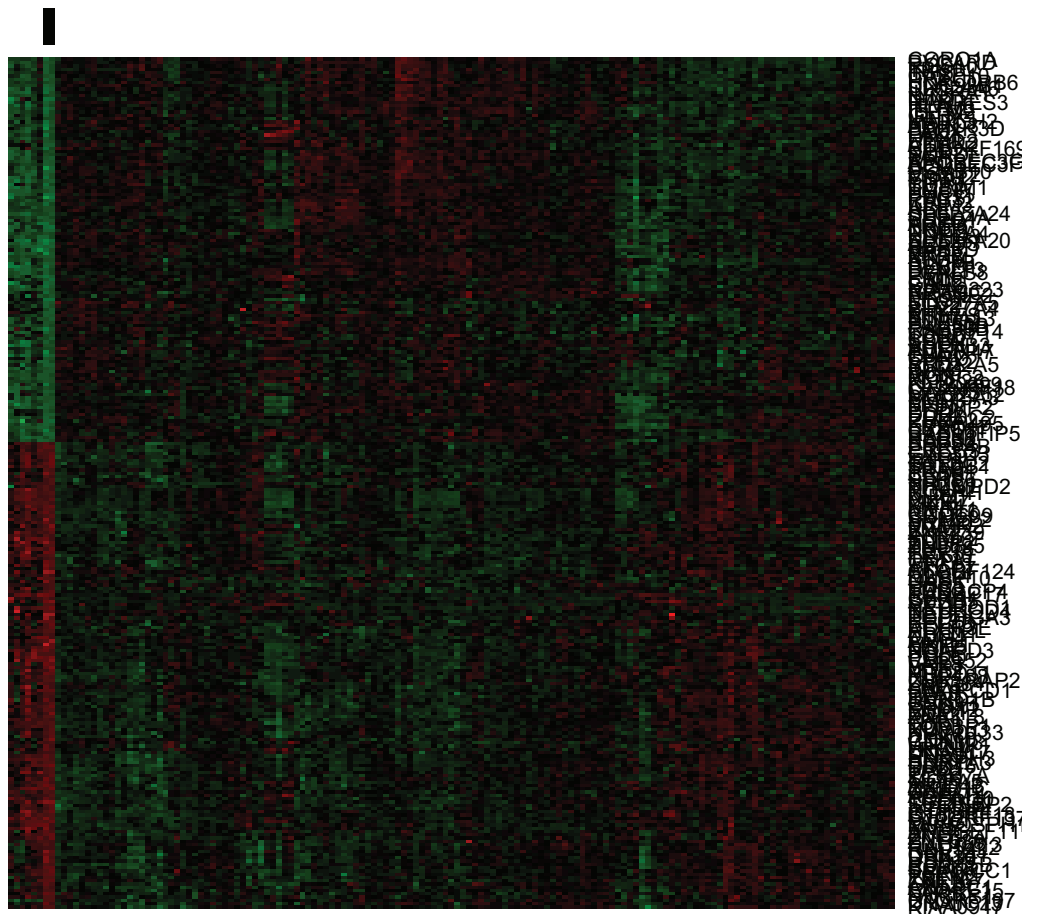

Samples

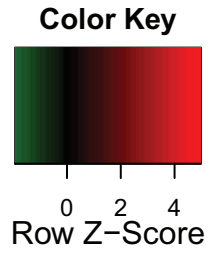

# FGFR1 Mutations

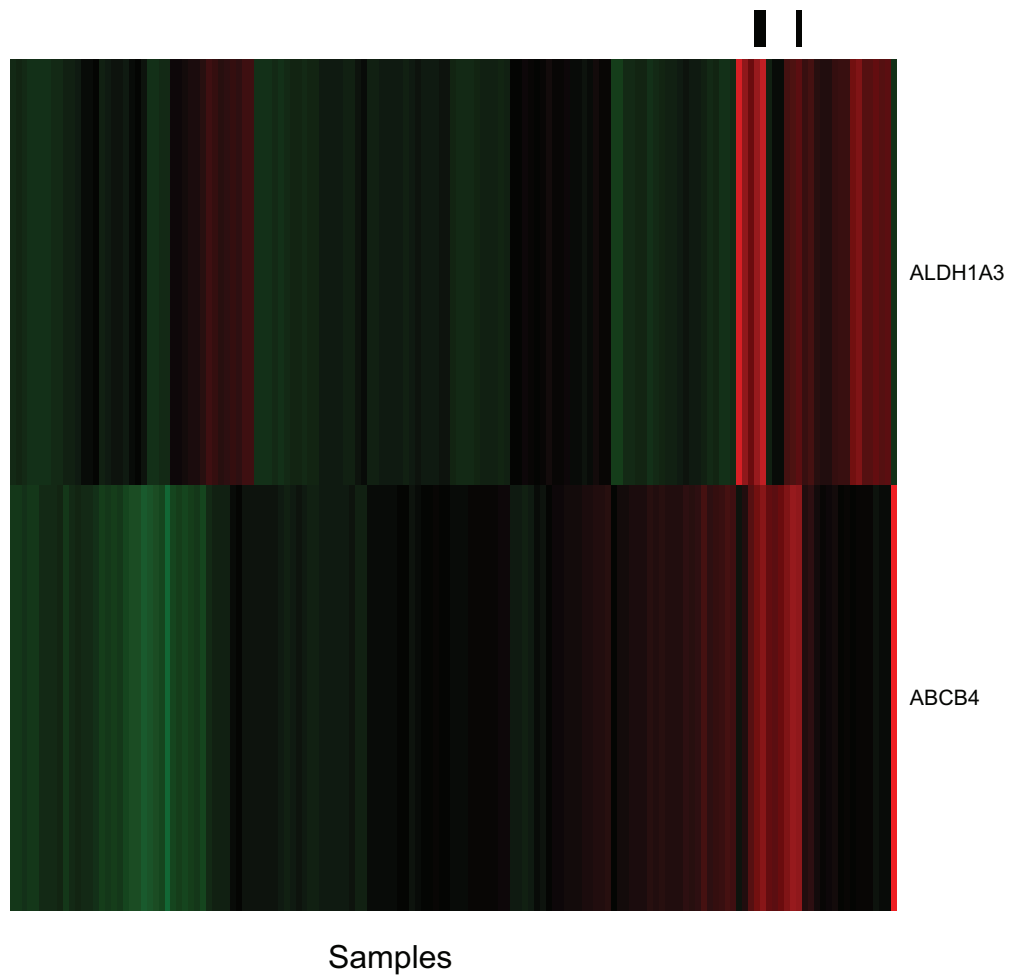

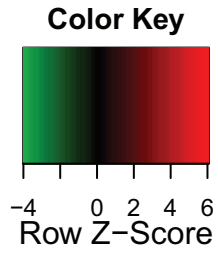

# FGFR4 Mutations



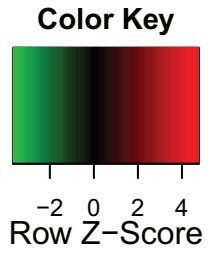

# FN1 Mutations



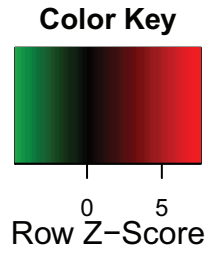

# FURIN Mutations

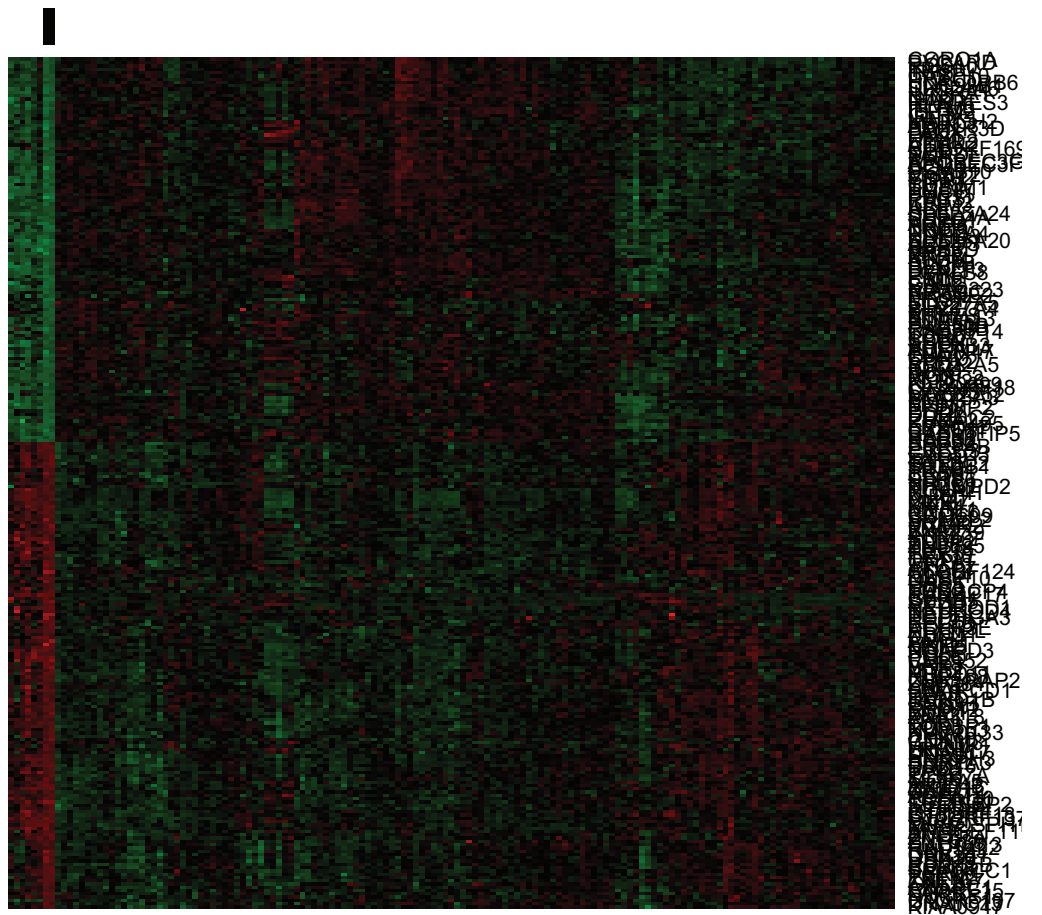

Samples

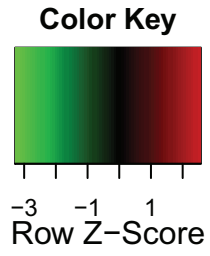

# HPN Mutations

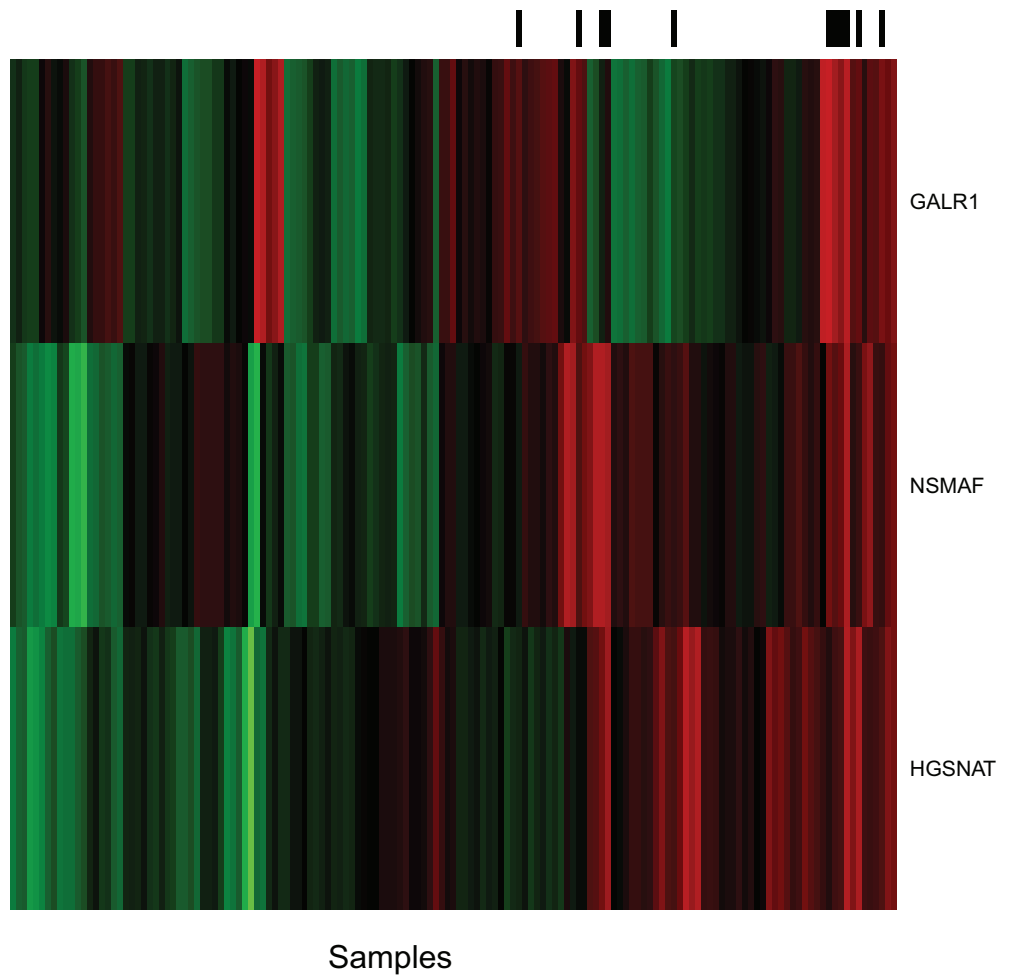



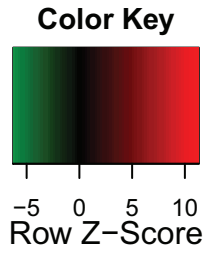

# IDH1 Mutations

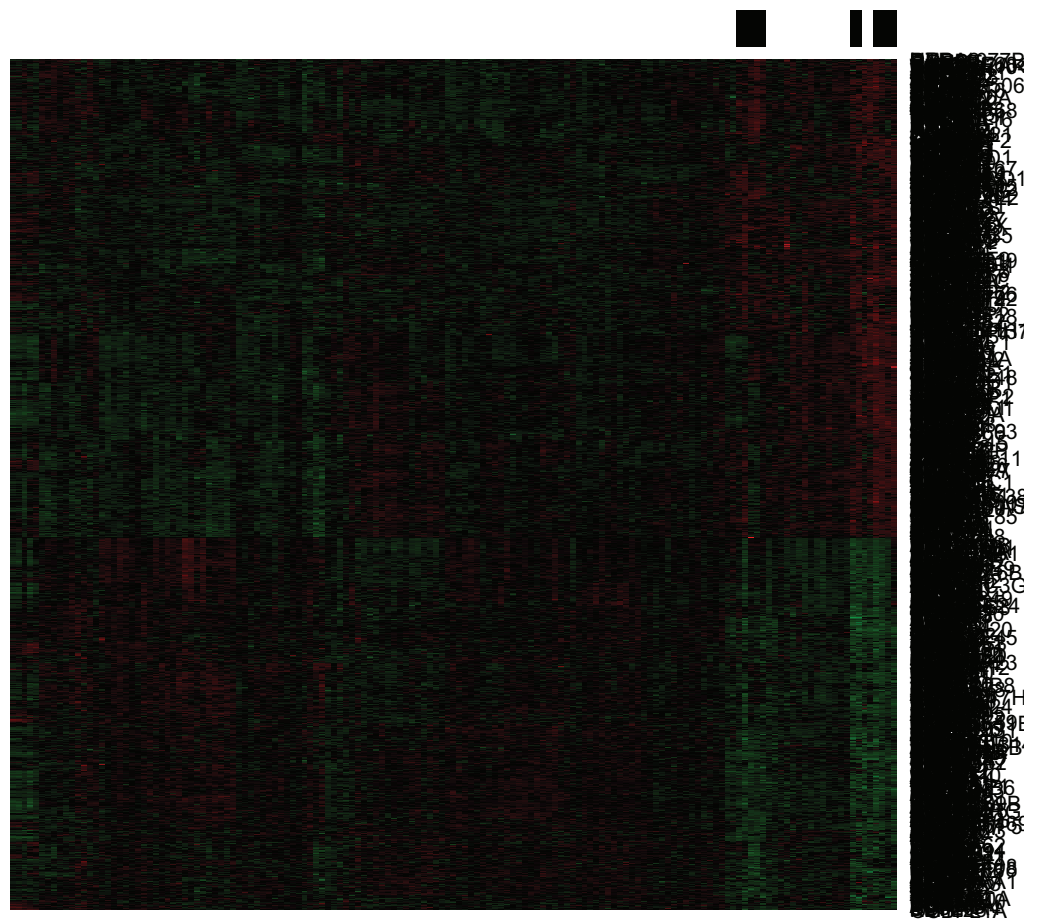

Samples

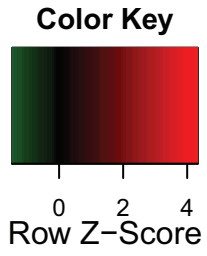

# INHBC Mutations

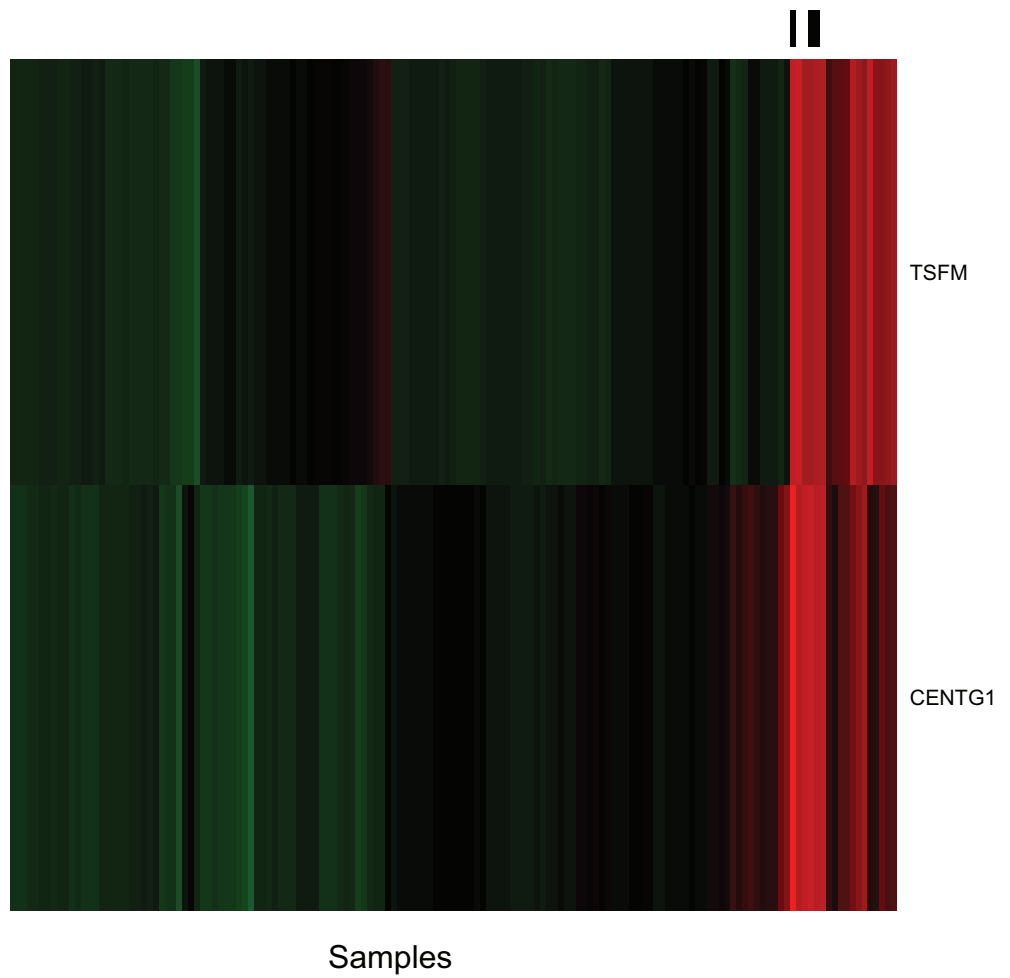

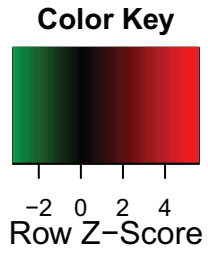

# KCNG1 Mutations

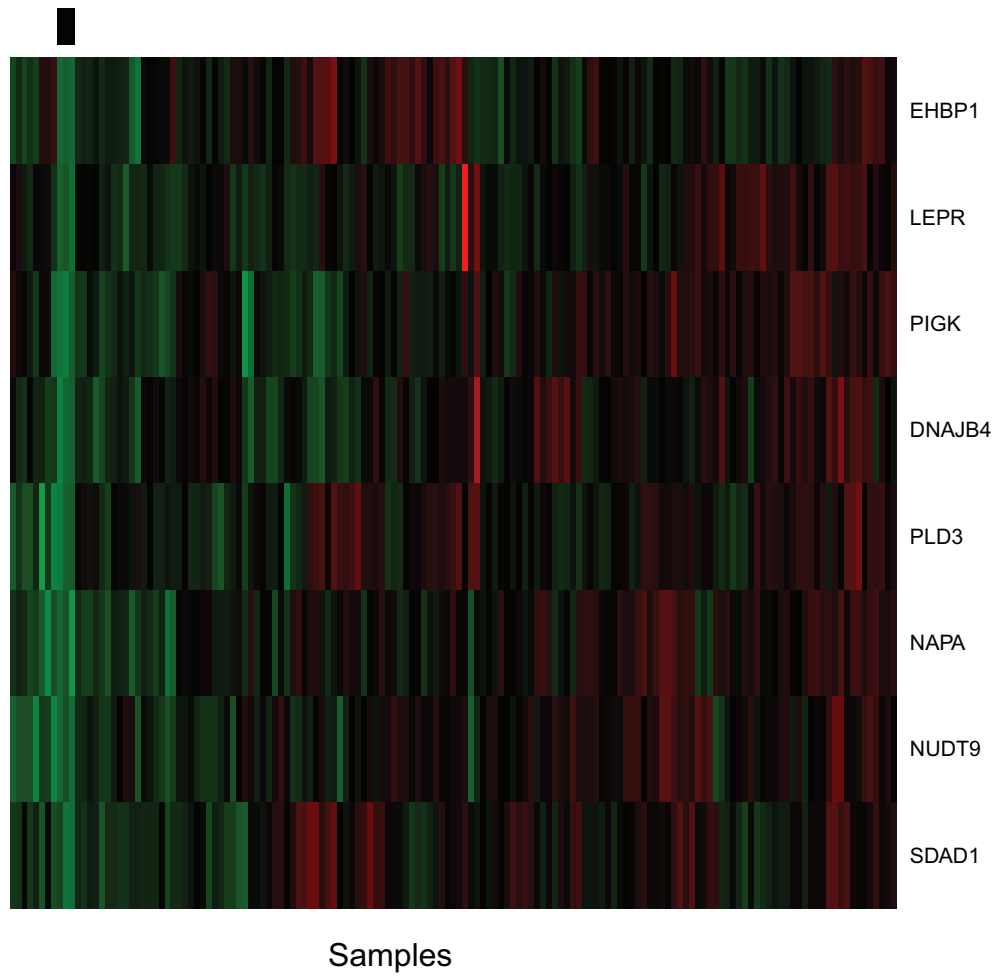

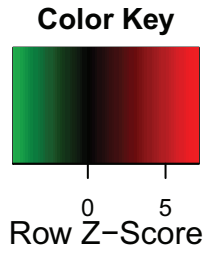

# KLF6 Mutations

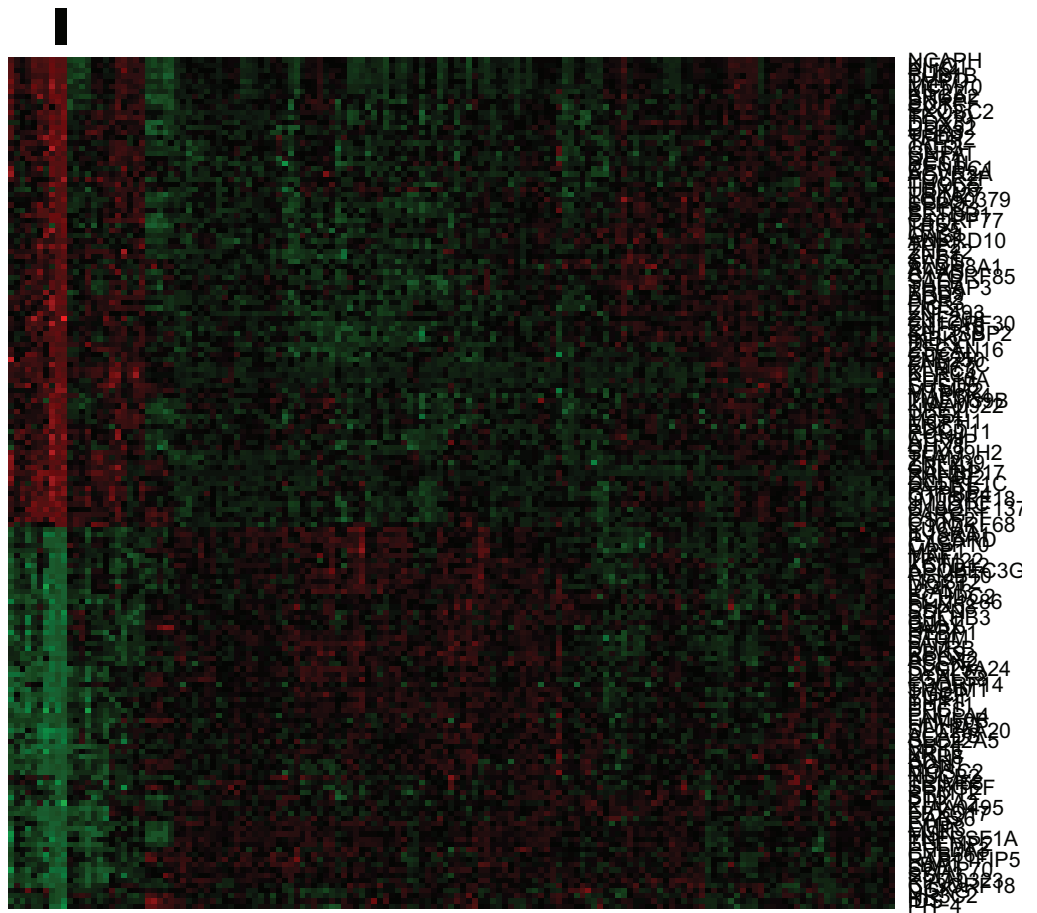

Samples



# LEMD3 Mutations



Samples

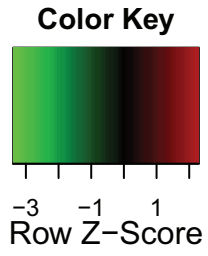

# LGALS3BP Mutations

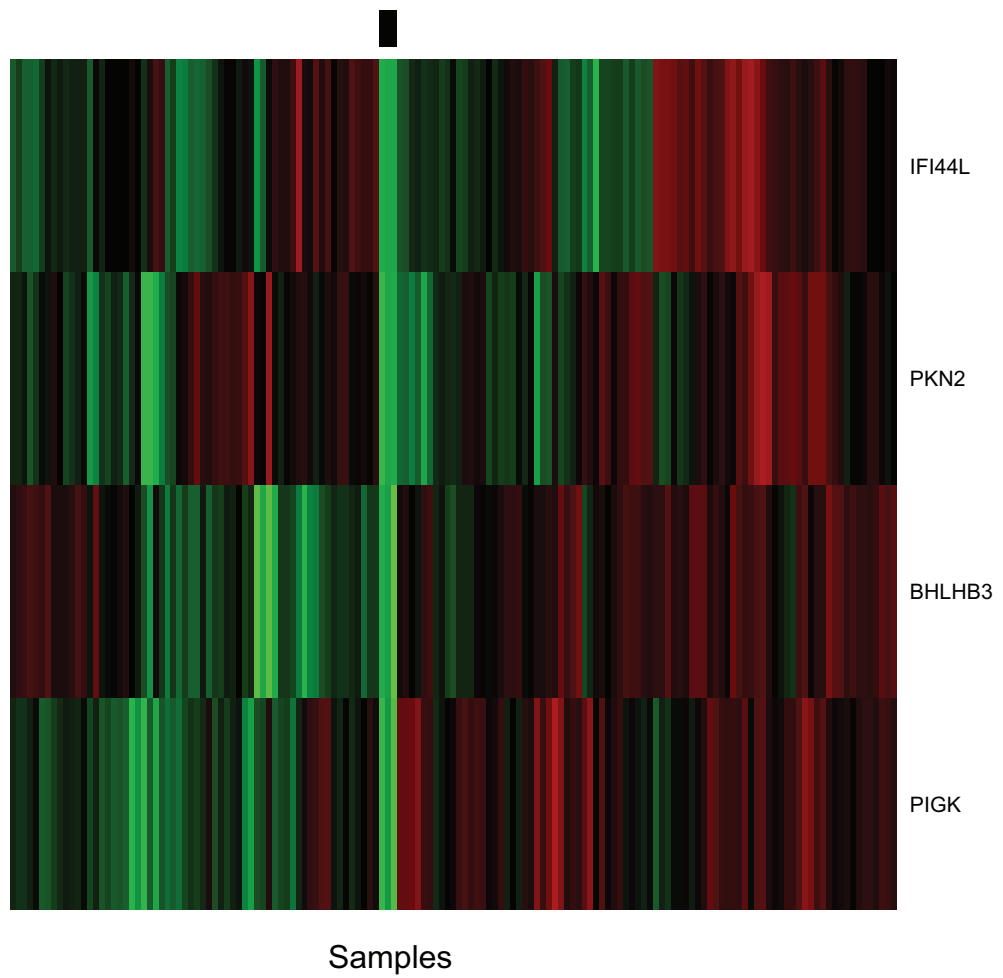

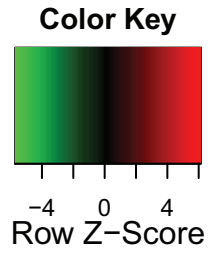

# LUM Mutations

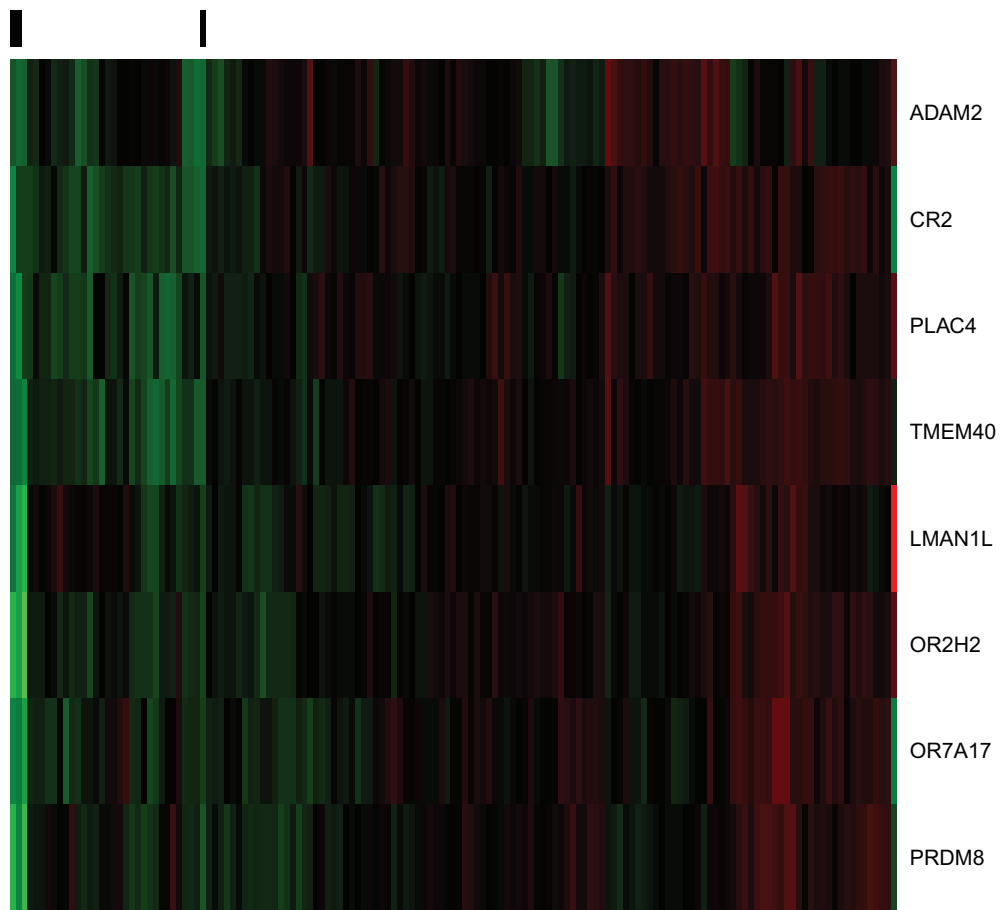

Samples

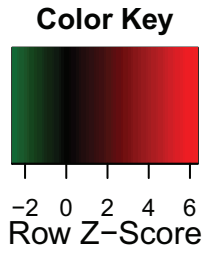

# MADD Mutations

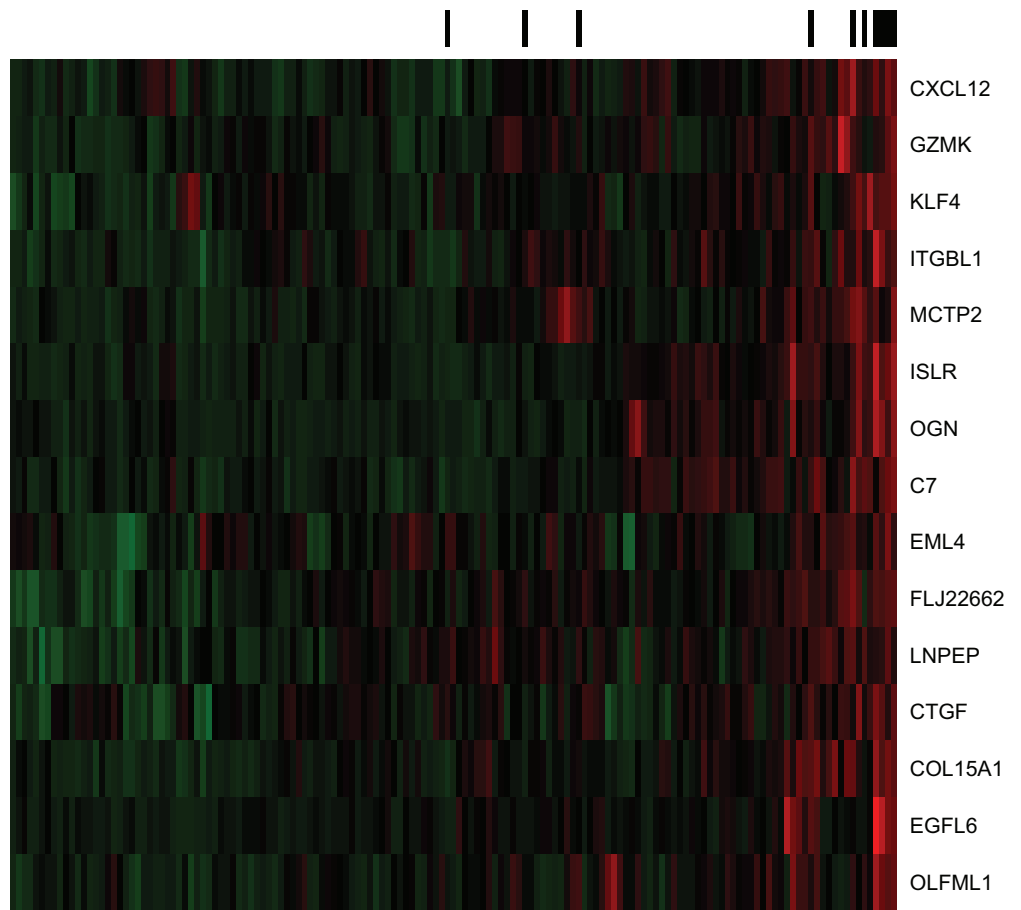

Samples





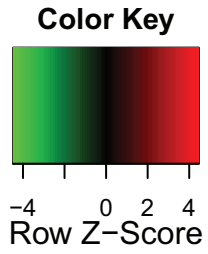

# MARK1 Mutations

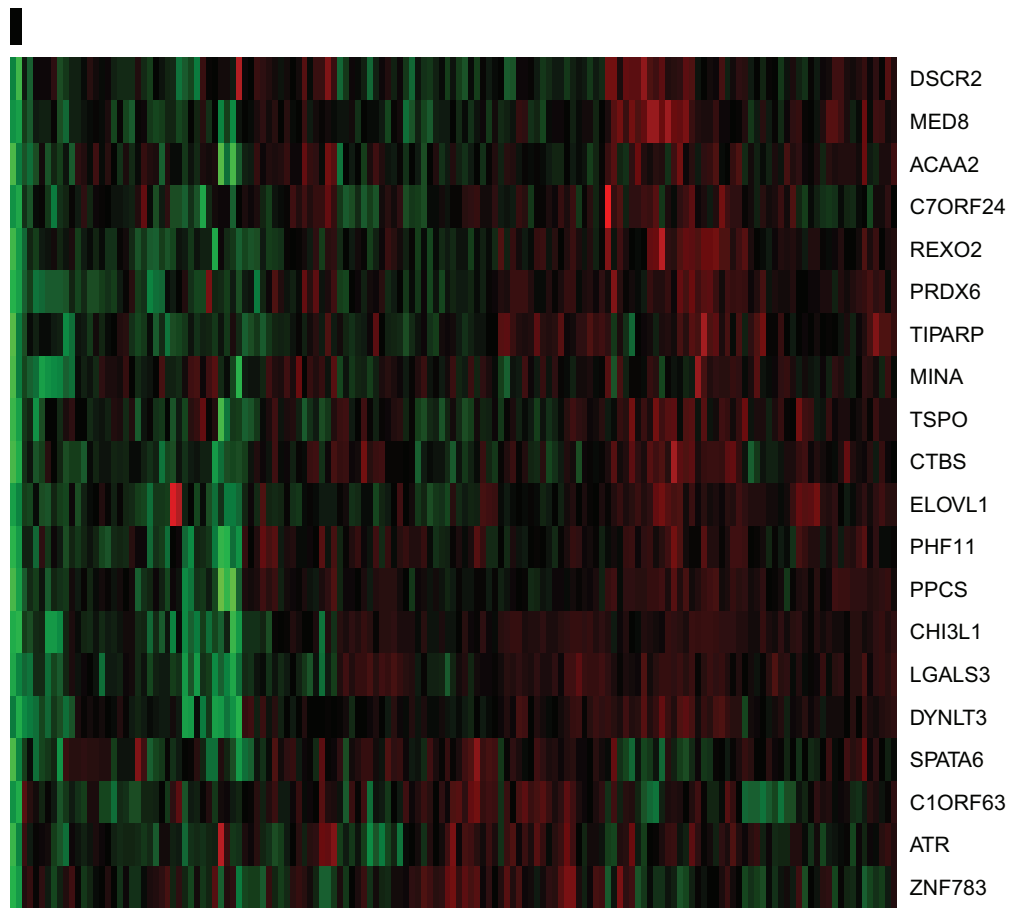

Samples

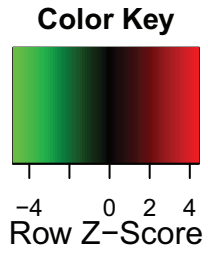

# MET Mutations

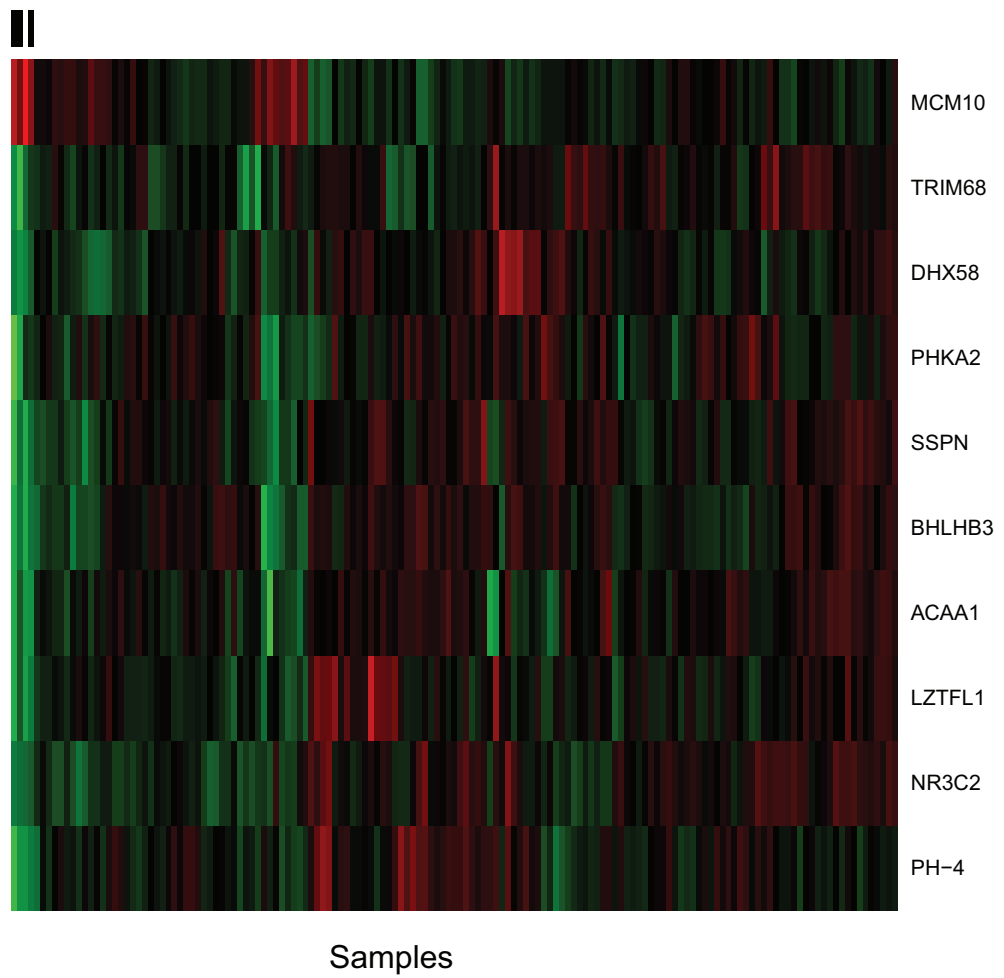

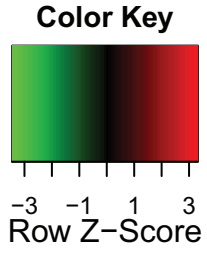

# MKI67 Mutations

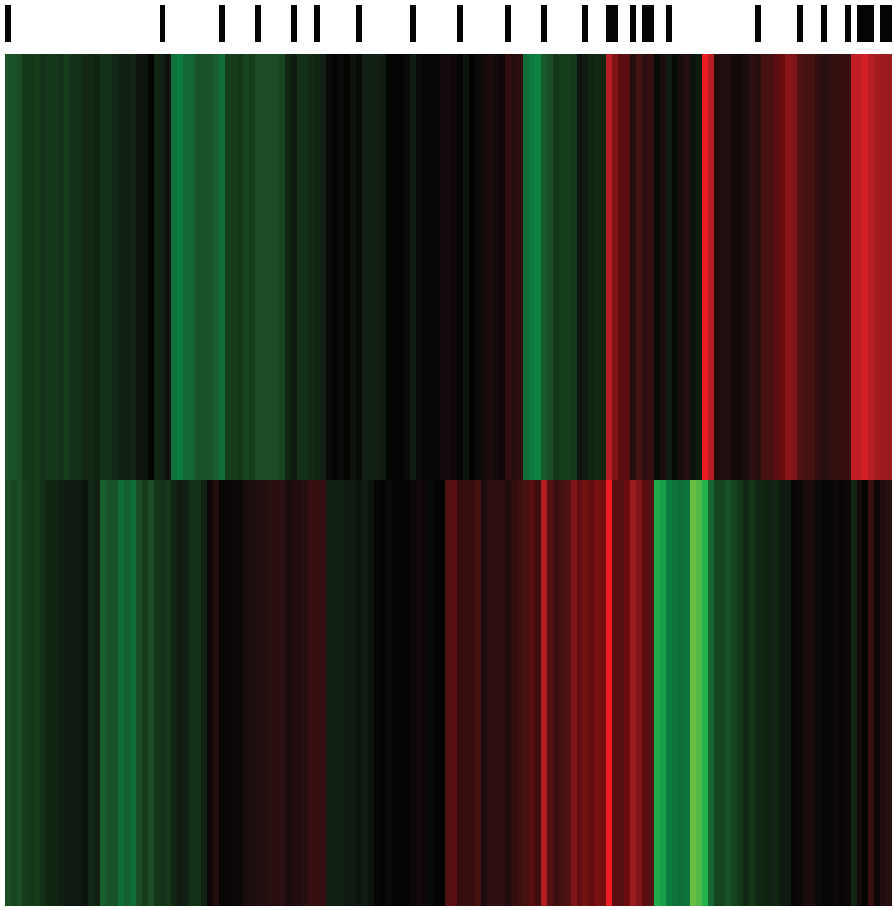

RAMP2

UNC84A

Samples

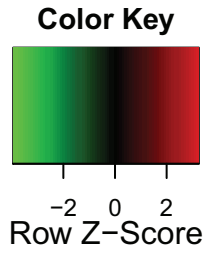

# MSH6 Mutations

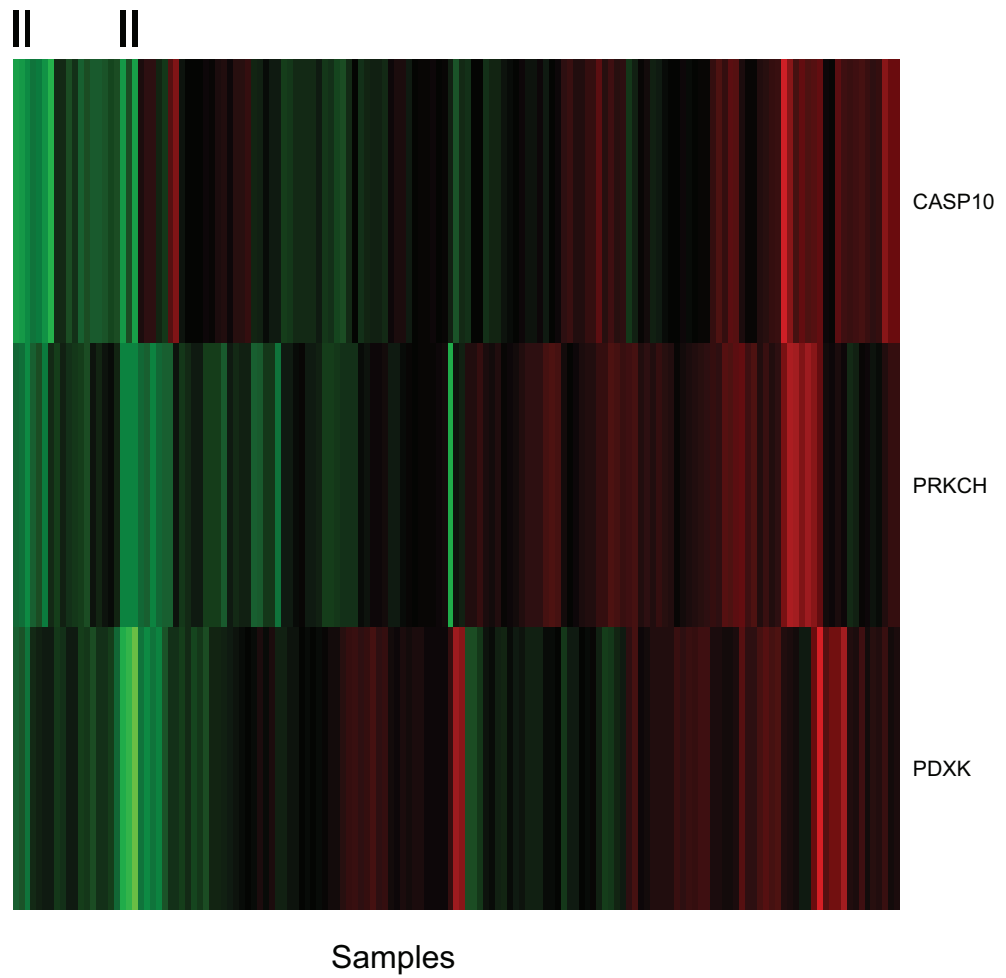



# MYST4 Mutations

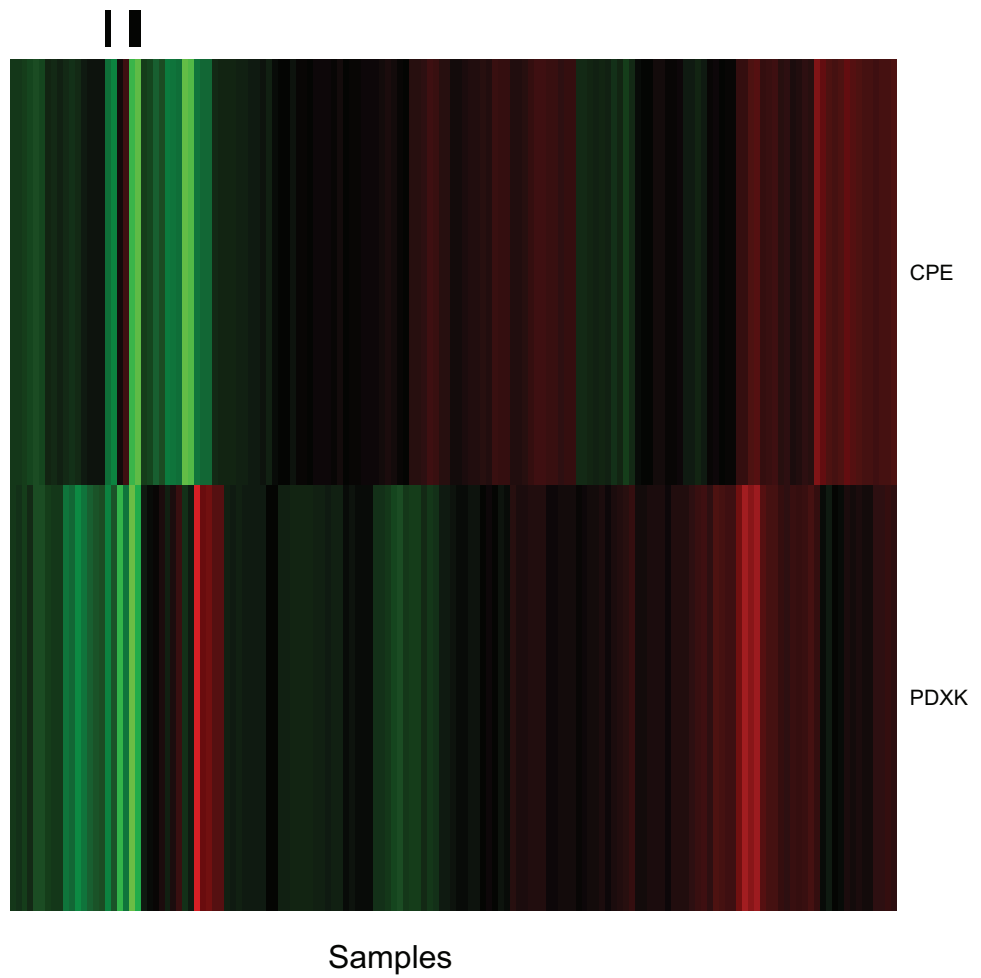

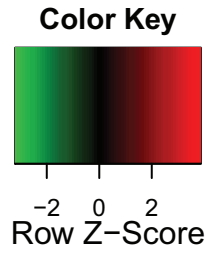

# NF1 Mutations

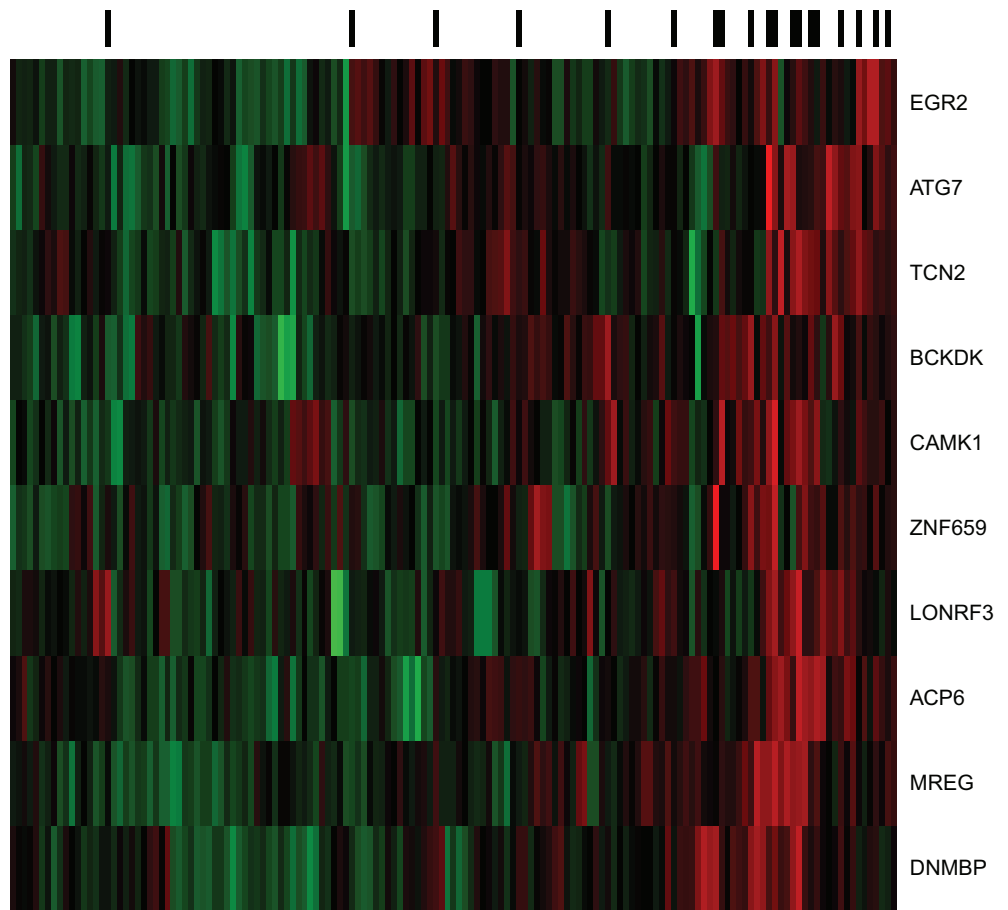

Samples

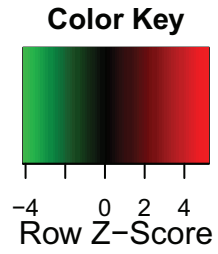

# NOS3 Mutations

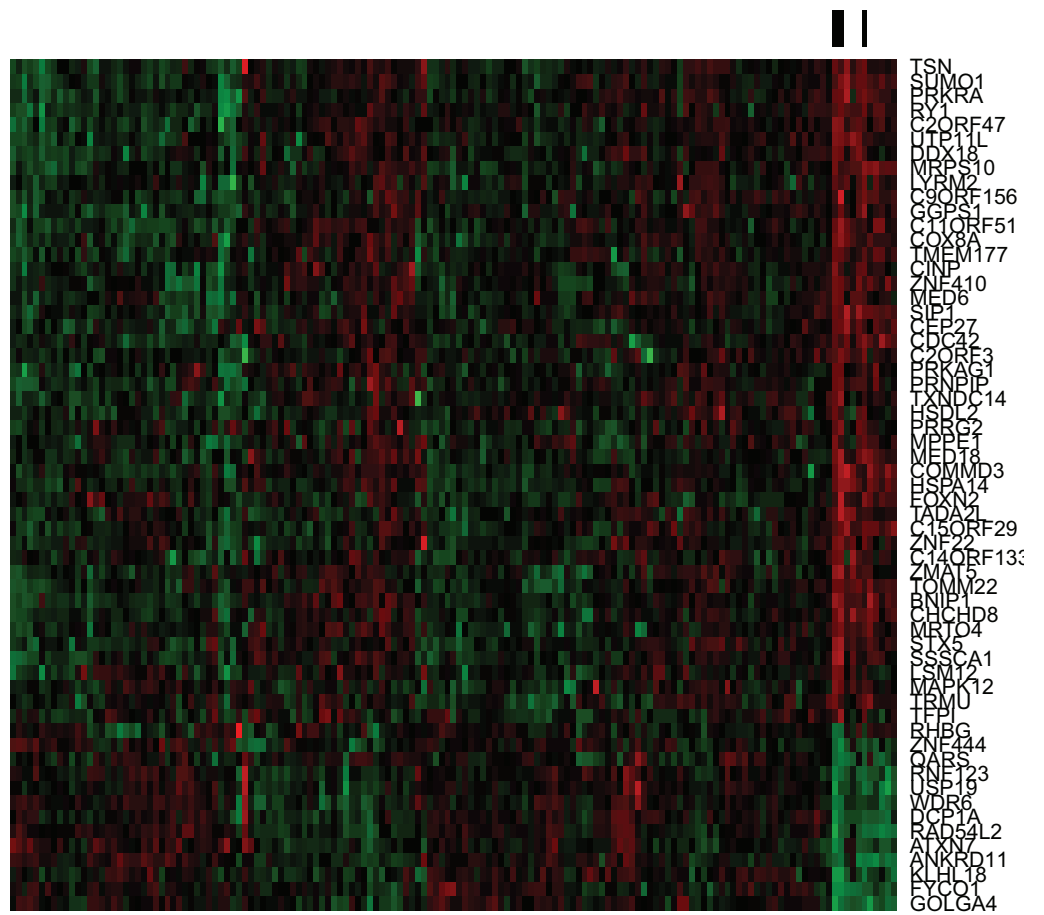

Samples



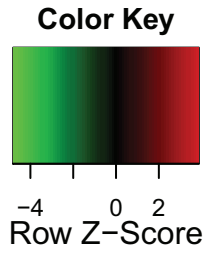

# PI15 Mutations

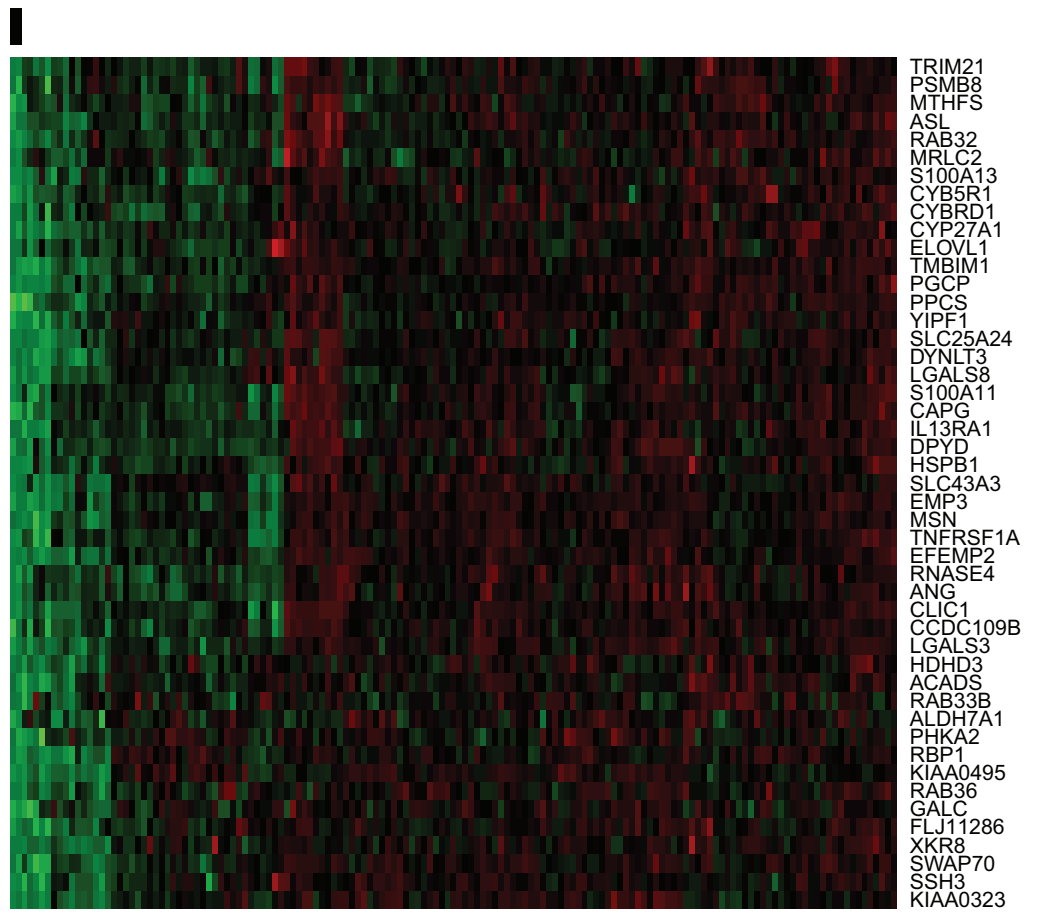

Samples

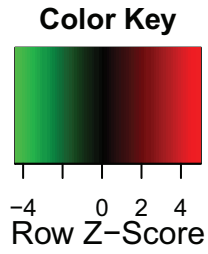

# PTK2B Mutations

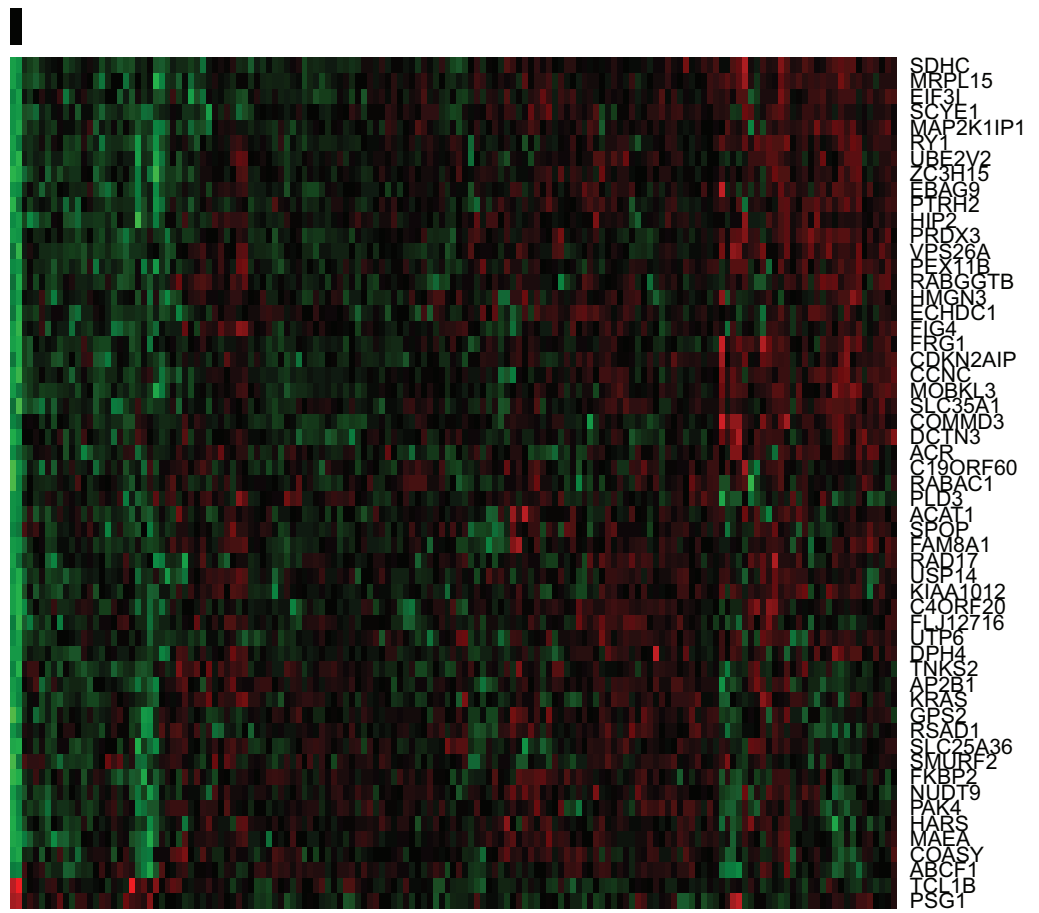

Samples

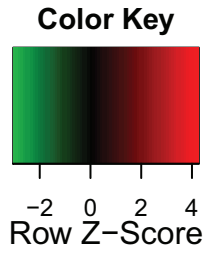

# RB1 Mutations

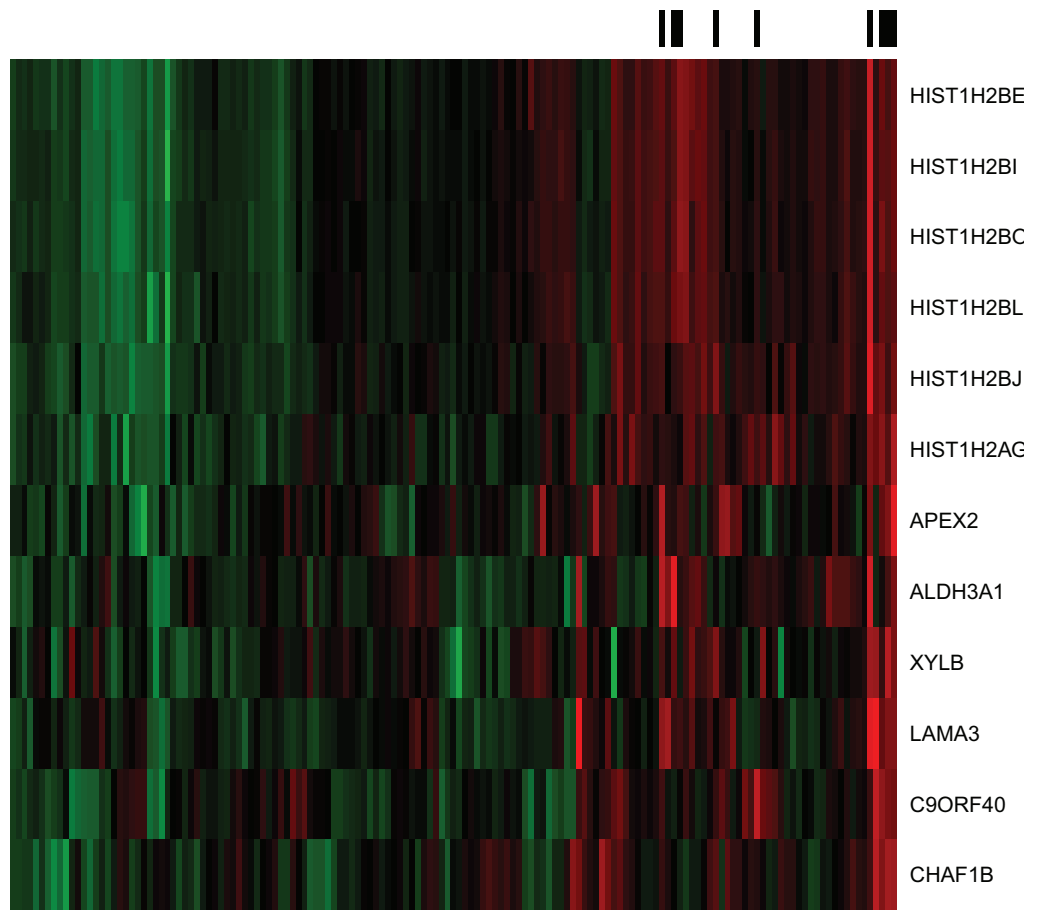

Samples

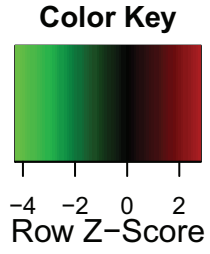

# SRGAP1 Mutations

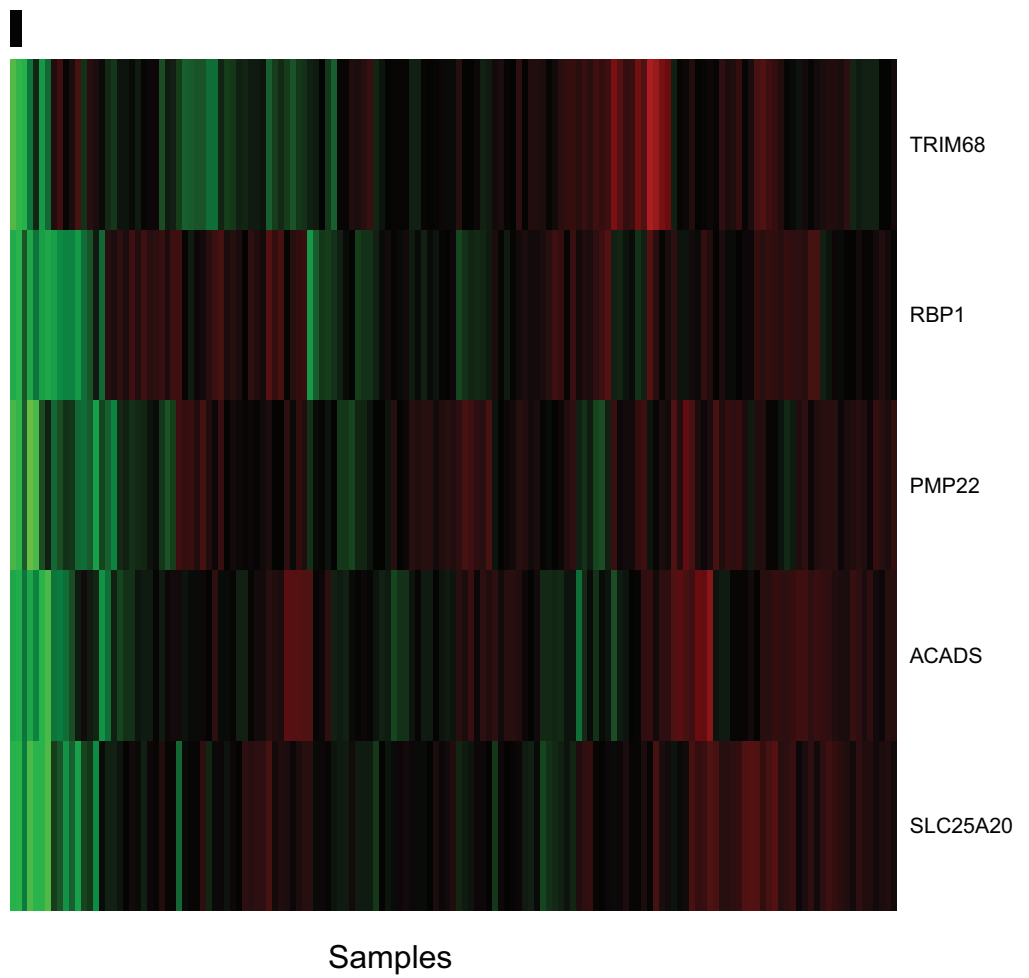

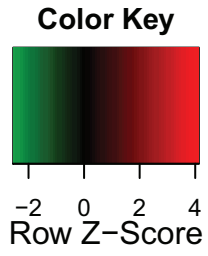

# STK36 Mutations

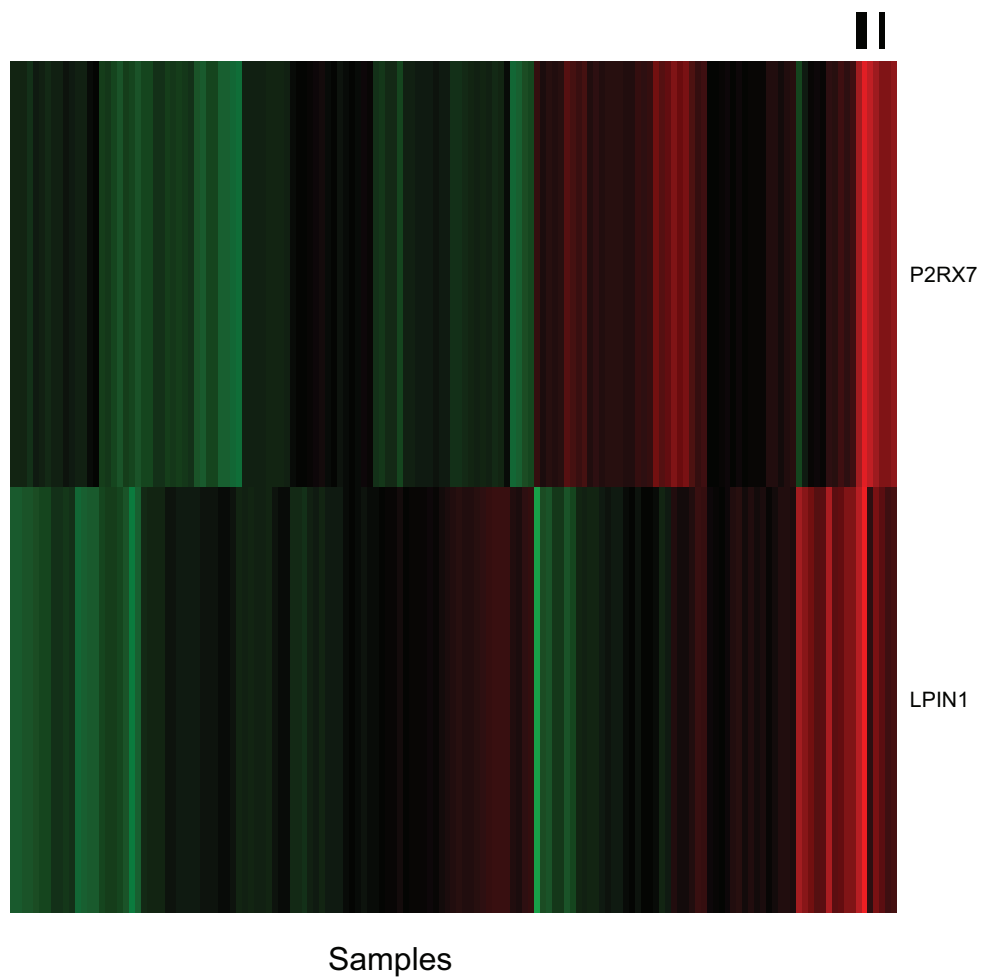

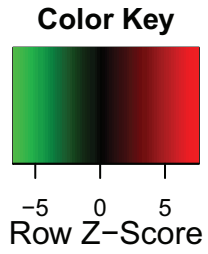

# SYNE1 Mutations

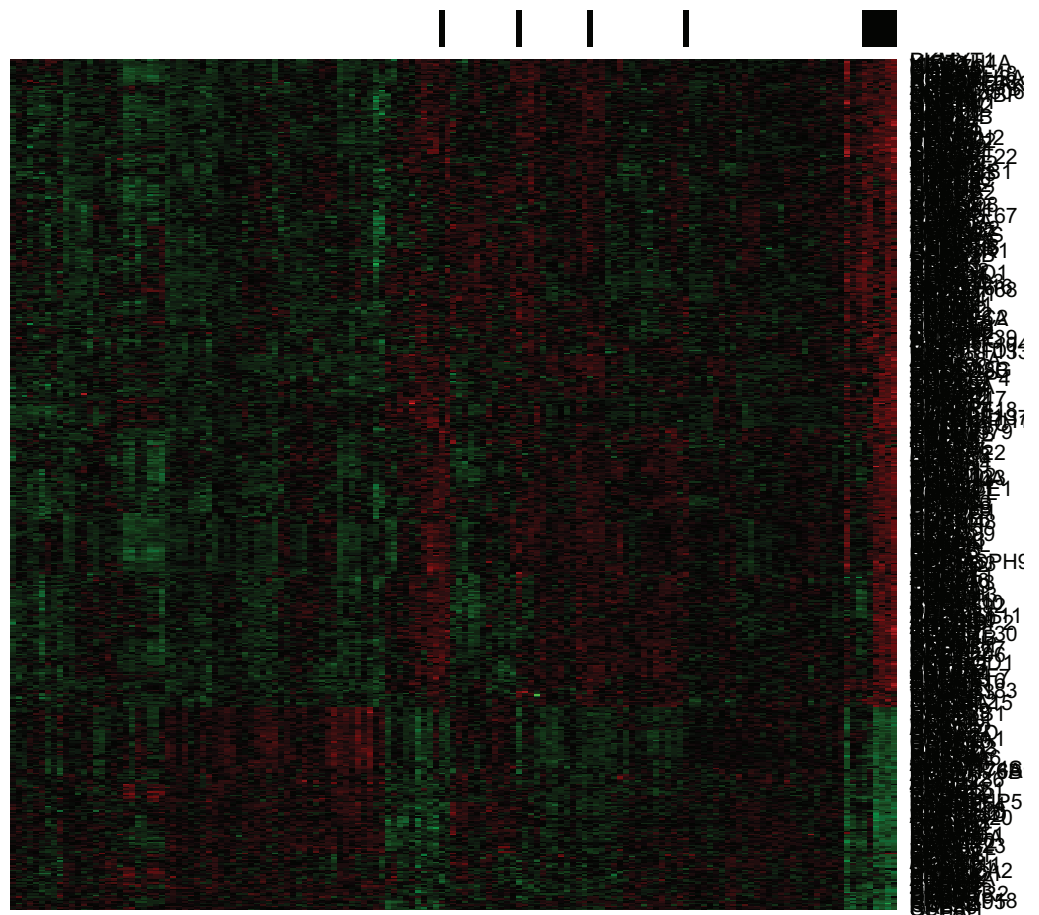

Samples

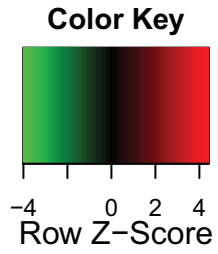

# TCF12 Mutations

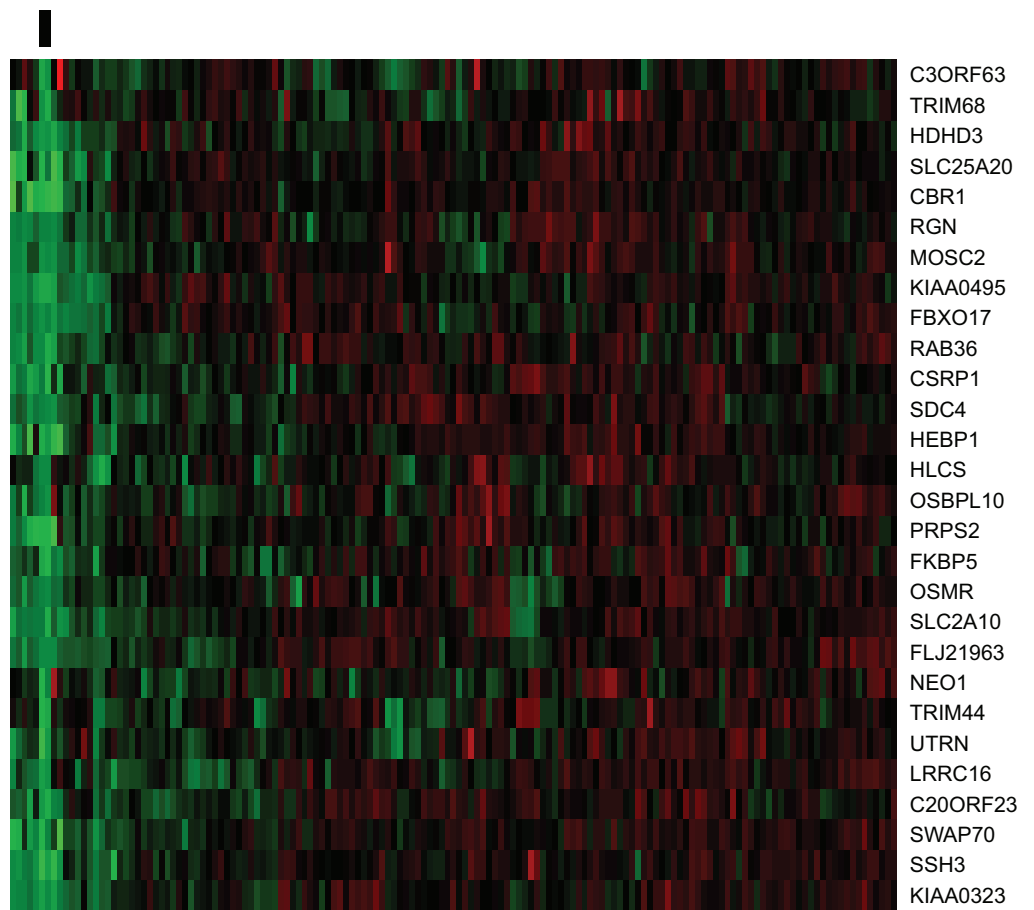

Samples

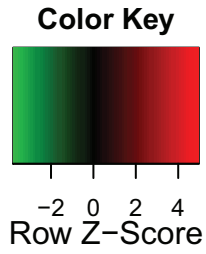

# TP53 Mutations

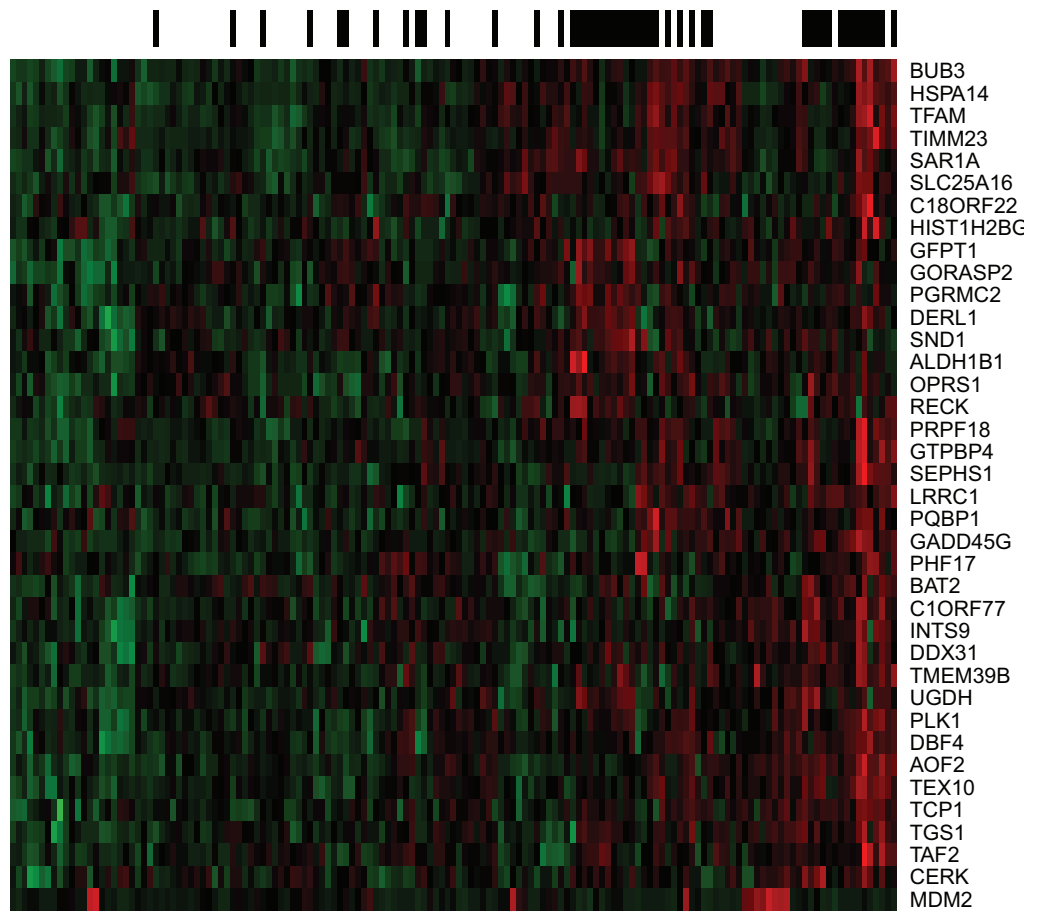

Samples



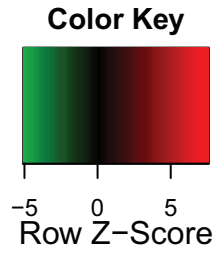

# TRPM3 Mutations

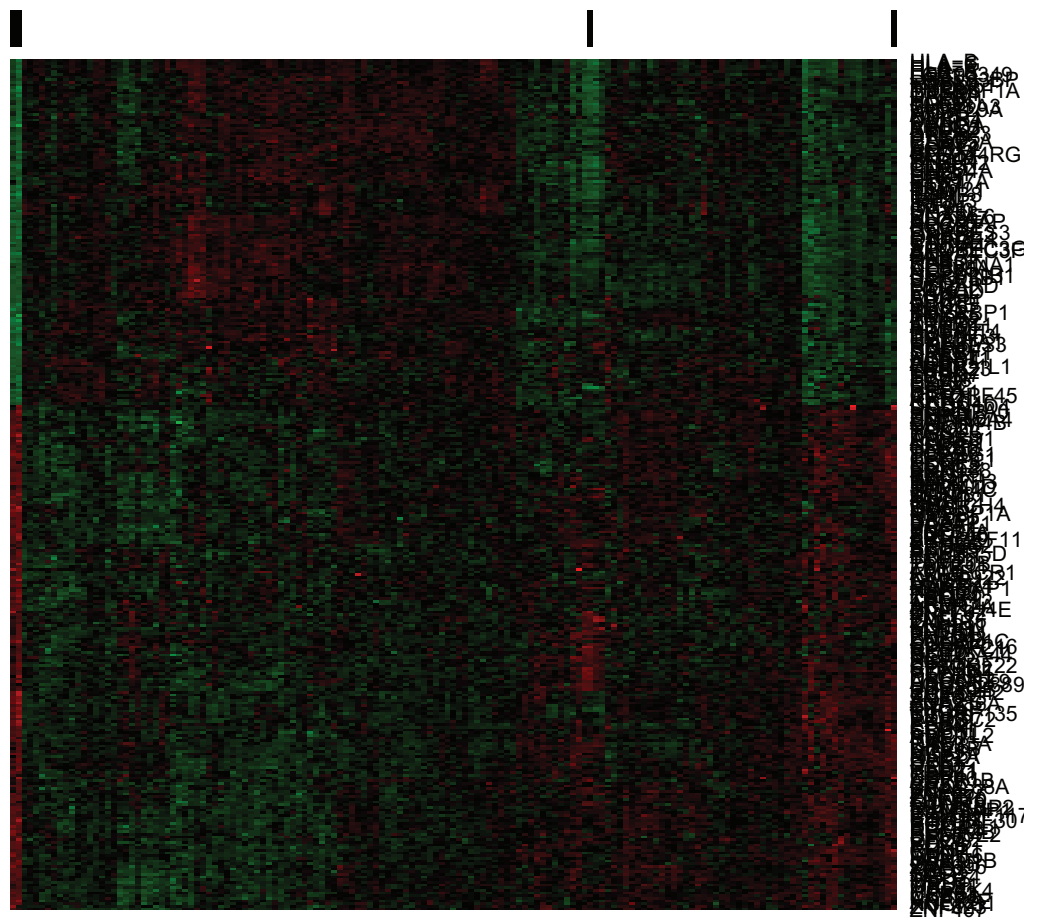

Samples

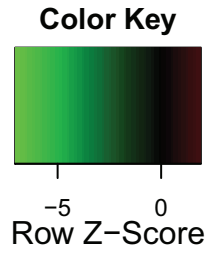

# WISP1 Mutations

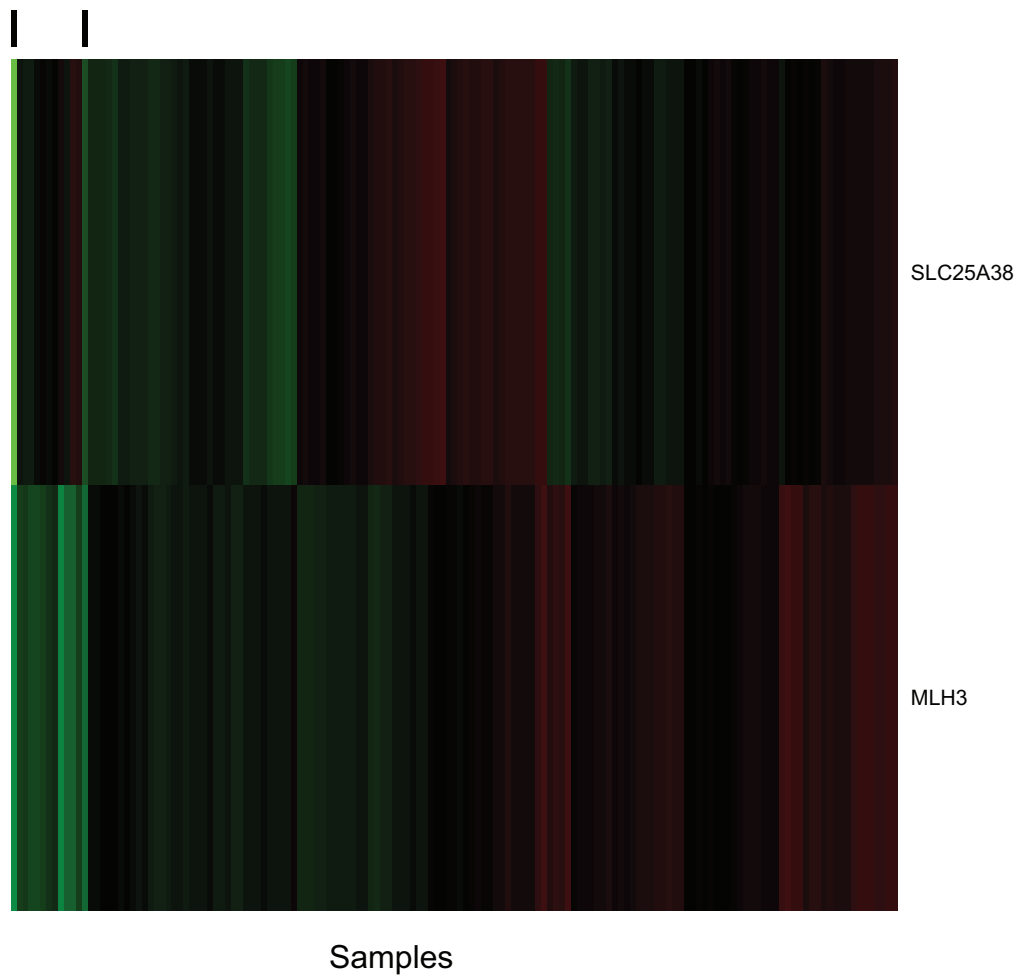

Supplement: NIHMS294817-supplement-2.pdf [file NIHMS294817-supplement-2.pdf]
